1 **Title**

2 RNAseq analysis of rodent spaceflight experiments is confounded by sample collection  
3 techniques

4 **Authors/Affiliations**

5 San-Huei Lai Polo<sup>1,2,#</sup>, Amanda M. Saravia-Butler<sup>2,3,#</sup>, Valery Boyko<sup>2,4</sup>, Marie T. Dinh<sup>2,3</sup>,  
6 Yi-Chun Chen<sup>1,2</sup>, Homer Fogle<sup>2,4</sup>, Sigrid S. Reinsch<sup>2</sup>, Shayoni Ray<sup>5</sup>, Kaushik  
7 Chakravarty<sup>6</sup>, Oana Marcu<sup>7</sup>, Rick B. Chen<sup>1,2</sup>, Sylvain V. Costes<sup>2,\*</sup>, Jonathan M.  
8 Galazka<sup>2,\*</sup>

9 <sup>1</sup> KBR, NASA Ames Research Center; Moffett Field, CA, 94035; USA

10 <sup>2</sup> NASA Ames Research Center; Moffett Field, CA, 94035, USA

11 <sup>3</sup> Logyx, LLC; Mountain View, CA 94043, USA

12 <sup>4</sup> The Bionetics Corporation, NASA Ames Research Center; Moffett Field, CA, 94035,  
13 USA

14 <sup>5</sup>NGM Biopharmaceuticals; South San Francisco, CA, 94080, USA

15 <sup>6</sup>VeriSIM Life; San Francisco, CA, 94104, USA

16 <sup>7</sup>Carl Sagan Center, SETI Institute; Mountain View, CA, 94043, USA

17 <sup>\*</sup>Corresponding authors

18 #These authors contributed equally

19 Correspondence: jonathan.m.galazka@nasa.gov, sylvain.v.costes@nasa.gov

## 20 **Summary**

21 To understand the physiological changes that occur in response to spaceflight, mice are  
22 transported to the International Space Station (ISS) and housed for variable periods of  
23 time before euthanasia on-orbit or return to Earth. Sample collection under such difficult  
24 conditions introduces confounding factors that need to be identified and addressed. We  
25 found large changes in the transcriptome of mouse tissues dissected and preserved on-  
26 orbit compared to tissues from mice euthanized on-orbit, preserved, and dissected after  
27 return to Earth. Changes due to preservation method eclipsed those between flight and  
28 ground samples making it difficult to identify spaceflight-specific changes. Follow-on  
29 experiments to interrogate the roles of euthanasia methods, tissue and carcass  
30 preservation protocols, and library preparation methods suggested that differences due  
31 to preservation protocols are exacerbated when coupled with polyA selection. This has  
32 important implications for the interpretation of existing datasets and the design of future  
33 experiments.

## 34 **Keywords**

35 Tissue preservation, RNAseq, Spaceflight, Mouse, Euthanasia, Liver, Muscle, Rodent  
36 Research, ISS, RNAlater, Quadricep, NASA

## 37 **Introduction**

38 Spaceflight places multiple stresses upon the human body including altered gravity  
39 fields and exposure to cosmic radiation, which lead to health risks for spacefaring  
40 humans (Institute of Medicine, 2008). Decades of research on astronauts has begun to  
41 reveal how humans respond to the spaceflight environment (Garrett-Bakelman et al.,  
42 2019) but physiological monitoring of astronauts is still limited. Thus rodent models have  
43 been essential for advancing our understanding of how mammals — including humans  
44 — respond to spaceflight. This includes the impact of spaceflight on muscle structure  
45 (Shen et al., 2017; Spatz et al., 2017; Tascher et al., 2017), liver (Beheshti et al., 2019;  
46 Jonscher et al., 2016) and immune functions (Pecaut et al., 2017; Rettig et al., 2017;  
47 Ward et al., 2018).

48 Despite success of the rodent model, sample collection under such difficult conditions  
49 introduces confounding factors that need to be identified and addressed. These are  
50 related to hardware limitations, small sample size, and severe restraints on astronaut  
51 crew availability. Successful experiments must work within these constraints to produce  
52 meaningful insights. In response, the first Rodent Research (RR) mission established  
53 new capabilities for conducting reliable long-duration experiments using rodents with  
54 on-orbit sample collection. Animals can either be euthanized onboard the ISS by or  
55 returned to Earth alive. Both approaches introduce confounding factors. The former is  
56 experimentally challenging but preserves the sample during exposure to microgravity,  
57 while the latter exposes the animal to re-entry stresses and sampling occurs only after a

58 variable lag between landing and euthanasia — essentially sampling re-adaptation to  
59 Earth conditions in addition to the response to spaceflight. Inconsistent handling of  
60 samples necessitates a clear understanding of how dissection and preservation  
61 protocols affect downstream data generation.

62 We previously showed, using transcriptomic, proteomic and immunohistochemical data  
63 from the Rodent Research-1 (RR-1), Rodent Research-3 (RR-3) and Space  
64 Transportation System (STS)-135 missions, that lipotoxic pathways are activated in  
65 rodent liver in two different strains of mice that were flown for as long as 42 days in  
66 space (Beheshti et al., 2019). Because animals in the RR-1 and RR-3 experiments were  
67 euthanized in space, this work suggested that space alone was the most likely cause for  
68 similar changes previously observed in liver samples from mice flown during the STS-  
69 135 experiments where animals returned live to Earth (Jonscher et al., 2016). The  
70 lipotoxic effect is stronger with duration and may have ramifications for astronauts'  
71 health during long missions. This analysis did not include two flight and two ground  
72 animals from RR-1 as these animals were dissected immediately after euthanasia on-  
73 orbit as opposed to the rest which were first returned to Earth as intact frozen carcasses  
74 for later dissection.

75 Here we now compare RNA-sequencing (RNAseq) datasets generated from livers  
76 preserved using these distinct protocols. We find large changes in the transcriptome of  
77 tissues dissected and preserved on-orbit compared to tissues from mice euthanized on-  
78 orbit, preserved intact by freezing on-orbit, and dissected after return to Earth. To

79 identify and mediate how the preservation method could have such a large effect on  
80 differential gene expression (DGE) results, we performed follow-on experiments to  
81 interrogate the role of euthanasia methods, tissue and carcass preservation protocols,  
82 and library preparation methods on DGE changes. Our findings have important  
83 implications for interpreting existing datasets and the design of future experiments.

## 84 **Results**

### 85 ***Preservation method is the primary driver of gene expression variance in RR-1*** 86 ***liver samples***

87 To assess gene expression differences in liver samples from the RR-1 NASA Validation  
88 mission (Cadena et al., 2019; Globus and Galazka, 2015; Ronca et al., 2019), RNA was  
89 extracted from livers dissected from spaceflight (FLT) and ground control (GC) animals  
90 either immediately after euthanasia (immediate preservation, I), or from frozen  
91 carcasses after partial thawing (carcass preservation, C), and sequenced following  
92 polyA selection. Principal component analysis (PCA) revealed preservation method (C  
93 vs. I) as the primary driver of variance among samples rather than spaceflight (FLT vs.  
94 GC) (Figure 1A). Furthermore, there was an order of magnitude difference in the  
95 number of differentially expressed genes (DEGs) identified in FLT versus GC carcass  
96 samples than was observed in FLT versus GC immediate samples, and only 4 DEGs  
97 overlapped between the two preservation methods (Figure 1B). Gene set enrichment  
98 analysis of FLT versus GC C- (Figure 2A) and I-derived (Figure 2B) samples showed no

99 overlap in enriched gene ontology (GO) terms (Figure 2C), showing that any gene  
100 expression changes in the liver as a result of spaceflight exposure were confounded by  
101 the sample preservation method used.

102 Since livers from only 2 FLT and 2 GC animals in the RR-1 NASA Validation mission  
103 were preserved via the immediate method, RNA from livers prepared via the immediate  
104 method from two additional studies, the RR-1 CASIS mission (Cadena et al., 2019;  
105 Globus et al., 2015; Ronca et al., 2019) and a ground-based preservation and storage  
106 study (Choi et al., 2016; GeneLab, 2016) were also sequenced following polyA  
107 selection. Despite multiple different experimental factors in RR-1 NASA, RR-1 CASIS,  
108 and the ground-based preservation studies, PCA continued to show preservation  
109 method as the primary driver of variance among samples in these datasets (Figure S1).

110 ***Carcass-preserved samples exhibit less uniform transcript coverage than***  
111 ***immediate-preserved samples***

112 To further investigate the observed differences in preservation method, RR-1 NASA  
113 FLT and GC liver samples derived from the carcass preservation method were grouped  
114 together (all-C) and FLT and GC liver samples derived from the immediate preservation  
115 method were grouped together (all-I). DGE was evaluated in all-C vs. all-I samples.  
116 Many more genes were differentially expressed in all-C vs. all-I samples than in either  
117 FLT-C vs. GC-C or in FLT-I vs. GC-I samples, further supporting preservation method  
118 as the primary driver of variance in RR-1 NASA liver samples (Figure 3A). Gene set  
119 enrichment analysis revealed that several of the gene ontologies enriched in carcass

120 samples (when compared with immediate samples) involved RNA regulation and  
121 processing (Figure 3B). Despite similarly high RNA Integrity Number (RIN) values  
122 (Figure S2), carcass samples exhibited significantly less 5' gene body coverage than  
123 immediate samples (Figure 3C&D).

124 ***Expression of genes involved in 5'-methylguanosine decapping and polyA***  
125 ***removal is affected by preservation condition***

126 Given the differences in gene body coverage between carcass and immediate samples,  
127 we evaluated the expression of 5'-methylguanosine decapping and polyA removal  
128 genes in these groups from the RNAseq data. In mammals, eight genes have  
129 decapping activity in vitro and/or in cells: Dcp2 (Nudt20), Nudt3, Nudt16, Nudt2, Nudt12,  
130 Nudt15, Nudt17, Nudt19. In addition, Dxo acts on partially capped mRNA's (Grudzien-  
131 Nogalska and Kiledjian, 2017). Two of these genes — Dxo and Nudt2 — were  
132 significantly more expressed in the carcass samples, while another two — Nudt15 and  
133 Dcp2 (Nudt20) — were significantly more expressed in immediate samples (Figure S3).  
134 Removal of polyA tails from mRNA is catalyzed by two complexes. The first, CCR4-  
135 NOT, consists of CNOT1, CNOT2, CNOT3, CNOT4, CNOT9, CNOT10, CNOT6,  
136 CNOT6L, CNOT7, and CNOT8. The second, PAN2-PAN3, consists of PAN2 and PAN3  
137 (Siwaszek et al., 2014). In the case of the 10 subunit CCR4-NOT complex, we observed  
138 5 genes that were more highly expressed in the immediate group (Cnot1, Cnot2, Cnot9,  
139 Cnot6, Cnot6l) and 3 that were more highly expressed in the carcass group (Cnot3,

140 Cnot10, Cnot7) (Figure 3E). In the case of the PAN2-PAN3 complex, both Pan2 and  
141 Pan3 were more highly expressed in the carcass group (Figure 3E).

142 ***Samples sequenced following ribodepletion exhibit more uniform transcript***  
143 ***coverage than samples prepared with polyA selection***

144 The polyA selection library preparation method, which was initially used to evaluate  
145 gene expression differences in RR-1 NASA Validation mission liver samples requires  
146 intact RNA to minimize bias (Kumar et al., 2017; Petrova et al., 2017). Since our data  
147 suggest that the carcass samples were more degraded than the immediate samples  
148 (Figure 3C&D), the total RNA isolated from the RR-1 carcass liver samples was used to  
149 prepare libraries with the ribodepletion method to minimize transcript integrity bias, then  
150 re-sequenced. PCA showed a more distinct separation of FLT and GC carcass samples  
151 when the samples were prepared via the ribodepletion method (Figure 4A) than by  
152 polyA selection (FLT-C and GC-C samples in Figure 1A). DEGs were identified in FLT  
153 vs. GC carcass samples prepared with the ribodepletion method and compared with  
154 those from poly-A prepared carcass samples. Although hundreds of DEGs in FLT vs.  
155 GC carcass samples overlap between ribodepleted and polyA prepared samples, more  
156 DEGs were identified in FLT vs. GC samples prepared with the ribodepletion method  
157 (Figure 4B), suggesting this method may be more sensitive. There was no overlap of  
158 enriched gene ontology terms in FLT vs. GC samples processed by ribodepletion and  
159 polyA enrichment (Figure 4C&D).



160 Next, transcript integrity was evaluated in the ribodepletion-prepared FLT and GC  
161 carcass samples and compared with polyA selection-prepared carcass samples.  
162 Samples prepared with the polyA selection method exhibited less coverage of the 5'  
163 portion of transcripts compared to ribodepletion-prepared samples (Figure 4E&F). Thus  
164 ribodepletion was used to further investigate the effects of preservation method  
165 (Carcass vs. Immediate) on gene-expression in a ground study.

166 ***Total RNA sequencing mitigates the impact of preservation method on gene***  
167 ***expression changes in the liver***

168 We designed a ground-based tissue preservation study to determine the best approach  
169 to mitigate the impact of preservation method on gene expression, and to identify other  
170 confounding variables important for interpreting data from other RR missions. We tested  
171 euthanasia and preservation techniques used in different RR missions and compared  
172 them to standard laboratory protocols for tissue preservation. In addition to liver  
173 samples, we also analyzed quadriceps to determine whether sample preservation  
174 methods also confounded DGE analysis in this tissue.

175 Mice of the same age, sex, strain, and source as those used in the RR-1 NASA  
176 Validation mission were used in the ground-based tissue preservation study. Mice were  
177 evenly divided into one of 6 groups as shown in Figure S4. The mice in groups 1-4 were  
178 euthanized with pentobarbital/phenytoin (Euthasol®) as in RR-1 (Choi et al., 2020), then  
179 subjected to various preservation protocols to evaluate the phenomena observed in RR-  
180 1 NASA carcass and immediate liver samples. Livers and quadriceps were dissected

181 immediately after euthanasia from mice in group 1. These tissues were divided into  
182 thirds and preserved in one of three ways: 1) freezing in dry ice to mimic the cold block  
183 that was used to freeze the immediate liver samples in the RR-1 NASA mission, 2)  
184 submersion in LN2, or 3) with RNA*later*<sup>™</sup>. After preservation, all tissues were stored at -  
185 80 °C until further processing.

186 Although it is common practice to dissect mice immediately after euthanasia, due to  
187 limitations in crew time for spaceflight experiments, immediate dissection is not always  
188 possible. Thus, most tissues are preserved *in situ* within the carcass. We therefore  
189 sought to determine the most effective way to preserve carcasses that would minimize  
190 unintended gene expression changes in tissues preserved *in situ*. Mice in groups 2-4  
191 were used to test three different carcass preservation methods: 1) slow freezing in dry  
192 ice (DI) to mimic the most common method of carcass preservation used in RR  
193 missions to date, 2) snap freezing by submersion in liquid nitrogen (LN2), and 3)  
194 segmenting the carcass into thirds and preserving in RNA*later*<sup>™</sup>, mimicking the  
195 preservation method used in the Rodent Research-7 mission. After preservation, all  
196 carcasses were stored at -80 °C until further processing.

197 Carcasses from mice in groups 2-4 were partially thawed, and quadriceps and livers  
198 were dissected, then snap frozen, and stored at -80 °C until RNA extraction to mimic the  
199 protocol most commonly implemented when carcasses return from spaceflight missions,  
200 including RR-1. A summary of all liver and quadriceps tissues evaluated in the present  
201 ground-based tissue preservation study are summarized in Tables S1 and S2,

202 respectively. Total RNA was extracted from all liver and quadriceps tissue samples and  
203 prepared for sequencing using the ribodepletion method and sequenced.

204 Global gene expression and transcript integrity were evaluated in liver samples from  
205 groups 1-4 to identify differences in DGE resulting from the carcass and immediate  
206 preservation protocols. PCA showed overlap among immediate samples despite  
207 differences in tissue preservation methods (Figure 5A). Similar to RR-1 carcass and  
208 immediate samples (Figures 1A & S1), the dry ice-preserved carcass and immediate  
209 samples, which mimic the RR-1 preservation conditions, clustered away from each  
210 other, albeit to a much lesser degree than that observed with the RR-1 samples (Figure  
211 5A). Furthermore, the dry ice-preserved carcass samples exhibited less 5' gene body  
212 coverage than the dry ice-preserved immediate samples (Figure 5B). Although this  
213 observation is consistent with that observed in RR-1 carcass and immediate samples  
214 (prepared using the polyA selection method) (Figure 3C&D), the difference was less  
215 dramatic. Therefore, using the ribodepletion method appears to partially alleviate the  
216 differences observed in transcript integrity between carcass and immediate samples.

217 ***Carcass preservation by LN2 or RNAlater™ immersion most closely mimic***  
218 ***standard tissue preservation protocols***

219 Livers dissected from carcasses preserved in either RNAlater™ or LN2 exhibit more  
220 overlap with immediate preserved liver samples than those from carcasses preserved in  
221 dry ice (Figure 5A). Unlike livers dissected from slow (dry ice) or snap (LN2) frozen  
222 carcasses, livers dissected from carcasses preserved in RNAlater™ showed no

223 difference in 5' to 3' transcript coverage when compared with livers dissected  
224 immediately after euthanasia (Figure 5B). These data suggest that carcass  
225 segmentation and preservation in RNA $later$ <sup>TM</sup> may protect the liver from transcript  
226 degradation when preserved *in situ*.

227 We next assessed the effects of various carcass freezing methods on gene expression  
228 changes in the liver when compared with livers that were dissected immediately after  
229 euthanasia then preserved in either RNA $later$ <sup>TM</sup> or LN2. Only a few genes were  
230 differentially expressed between livers dissected immediately and preserved on dry ice,  
231 in RNA $later$ <sup>TM</sup>, or in LN2 (Table S3). Similarly, pairwise gene set enrichment analysis  
232 showed no significantly enriched GO terms between these tissue preservation methods  
233 (Table S3), suggesting that for immediately dissected livers, the tissue preservation  
234 method had minimal impact on gene expression. Livers dissected from slow (dry ice)  
235 frozen carcasses, which most closely mimics the carcass preservation method used in  
236 RR-1 NASA and several other RR missions (including RR-3 and Rodent Research-6),  
237 exhibited the most DEGs when compared with immediately dissected livers preserved  
238 in either LN2 or RNA $later$ <sup>TM</sup> (Tables 1 and S4, respectively). In contrast, livers dissected  
239 from carcasses preserved in either RNA $later$ <sup>TM</sup> or LN2 exhibited hundreds fewer DEGs  
240 when compared with immediately dissected livers preserved in either LN2 or  
241 RNA $later$ <sup>TM</sup> (Tables 1 and S4, respectively). These data indicate that carcass  
242 segmentation and preservation in RNA $later$ <sup>TM</sup> or preserving carcasses by submersion in  
243 LN2 more closely mimic the common preservation methods used in terrestrial

244 laboratories, than does the slow freeze carcass preservation method used in the RR-1  
245 NASA Validation study.

246 ***The impact of preservation method on gene expression is tissue dependent***

247 To determine if the observed differences in gene expression due to carcass  
248 preservation method is unique to the liver, gene expression and transcript integrity was  
249 also evaluated in quadriceps from mice in groups 1-4 (Figure S4 and Table S2). PCA  
250 showed more overlap among carcass and immediate quadriceps samples (Figure 5C)  
251 than among carcass and immediate liver samples (Figure 5A), suggesting that gene  
252 expression in the quadriceps is less sensitive to preservation methods. Unlike liver  
253 samples, almost no significant differences were observed in 5' to 3' gene body coverage  
254 in quadriceps samples prepared using different preservation methods (Figure 5D).

255 Fewer DEGs were identified in carcass vs. immediate quadriceps samples than carcass  
256 vs. immediate liver samples for almost every preservation method tested (Tables 2, S5,  
257 S6), further supporting that gene expression in the quadriceps is less sensitive to  
258 different types of preservation methods. Although there are fewer differences over-all,  
259 similar to what was observed in liver samples, cutting the carcass into thirds then  
260 preserving in RNA<sup>later</sup><sup>TM</sup> resulted in the fewest DEGs when compared with immediate  
261 dissection followed by tissue preservation in LN2 or RNA<sup>later</sup><sup>TM</sup> (Tables 2 and S6).

262 ***Gene expression in select tissues was not affected by the method of euthanasia***

263 Since the most common euthanasia method used in RR missions to date is  
264 intraperitoneal (IP) injection of ketamine/xylazine and the most common euthanasia  
265 method used in standard laboratories is CO<sub>2</sub> inhalation, these methods were used to  
266 euthanize mice in groups 5 and 6, respectively, to determine if euthanasia method is  
267 another confounding variable that could affect gene expression in select tissues (Figure  
268 S4, Tables S1 and S2). Gene expression was evaluated in livers and quadriceps  
269 dissected from mice in groups 2, 5, and 6 (Figure S5A-D). PCA showed no distinct  
270 differences in global gene expression in liver (Figure S5A) or quadriceps (Figure S5B)  
271 samples dissected from mice euthanized with different methods. Pairwise differential  
272 gene expression analysis and gene set enrichment analysis also identified few, if any,  
273 DEGs and enriched GO terms among liver (Figure S5C) and quadriceps (Figure S5D)  
274 samples. These data suggest that the types of euthanasia methods evaluated here do  
275 not impact gene expression in select tissues.

## 276 ***Discussion***

277 Herein, we show that protocols used to preserve mouse carcasses on-orbit have large  
278 effects on gene expression patterns as measured by RNAseq. Indeed, changes in gene  
279 expression due to preservation condition overwhelmed those due to spaceflight. Gene  
280 set enrichment analysis showed that many GO terms enriched due to carcass  
281 preservation were involved in RNA processing. This correlated with reduced transcript  
282 integrity (relatively poor coverage of the 5' end of transcripts) in samples from carcasses

283 preserved on-orbit when these were sequenced with a polyA enrichment RNAseq  
284 protocol.

285 While RNAseq following polyA selection can more efficiently quantify gene expression  
286 ([Kumar et al., 2017](#)), ribodepletion methods are more effective on degraded RNA  
287 samples ([Li et al., 2014](#); [Schuierer et al., 2017](#)). However, while the RNA used in this  
288 study was of good quality (RIN > 7) we observed a severe bias in transcript coverage  
289 following polyA selection depending upon the tissue preservation condition utilized.  
290 Specifically, samples taken from carcasses that were slow-frozen on-orbit exhibited a  
291 lower 5' to 3' coverage ratio as compared to samples taken from immediately dissected  
292 tissues. While resequencing of the carcass flight samples with a ribodepletion protocol  
293 produced a more even 5' to 3' coverage ratio, our follow-on studies that directly  
294 compared slow carcass freezing to immediate dissection revealed a similar (albeit  
295 reduced) 5' to 3' coverage bias. Taken together, this suggests that slow carcass  
296 freezing causes transcript degradation that in-turn leads to reduced 5' coverage.

297 mRNA degradation starts with the removal of the polyA tail, at which point degradation  
298 continues either from the 3' end *via* the exosome complex, or the 5' end following  
299 removal of the 5'-methylguanosine cap. Deadenylation of cytoplasmic mRNA is the rate  
300 limiting step in mRNA degradation and is catalyzed by one of two complexes. The  
301 CCR4-NOT complex, which consists of 10 subunits (CNOT1, CNOT2, CNOT3, CNOT4,  
302 CNOT6, CNOT6l, CNOT7, CNOT8, CNOT9, CNOT10), and the PAN2-PAN3  
303 deadenylation complex consisting of two subunits (PAN2, PAN3) ([Siwaszek et al.,](#)

304 2014). We observed transcriptional changes to multiple subunits in each of these  
305 complexes when comparing carcass and immediate samples. Most striking was the  
306 coordinate upregulation of both Pan2 and Pan3 in the carcass samples from RR-1,  
307 which suggest an increase in PAN2-PAN3 deadenylation activity, which could result in  
308 loss of polyA tails in some transcripts. This could lead to poor mRNA capture by our  
309 polyA enrichment protocol and result in some of the differences seen between the polyA-  
310 enrichment and ribodepletion protocols.

311 Three proteins - Dcp2 (Nudt20), Nudt3, Nudt16 - have decapping activity both in vitro  
312 and in cells, while an additional five – Nudt2, Nudt12, Nudt15, Nudt17, Nudt19 – have  
313 decapping activity in vitro. In addition, the Dxo family of proteins acts on partially capped  
314 mRNA's (Grudzien-Nogalska and Kiledjian, 2017). While regulation of these proteins is  
315 complex and involves subcellular localization and post-translation modification, we  
316 observed evidence for altered expression of these decapping enzymes: Dxo and Nudt2  
317 were more abundant in carcass samples, while Nudt15 and Dcp2 (Nudt20) were more  
318 abundant in immediate samples. While these changes are not coordinated, they do  
319 point to altered decapping activity within the carcass samples. As decapping proceeds  
320 mRNA degradation via the 5' exonuclease, XRN1, this could alternatively explain the  
321 relatively poor 5' transcript coverage seen in both polyA enriched and ribodepleted  
322 carcass liver samples. Additional experimentation will be necessary to confirm the  
323 changes to decapping and deadenylation enzymes seen here and to understand their  
324 role in the 5' to 3' coverage bias observed.



325 We observed a marked difference in the 5' to 3' coverage bias between liver and  
326 quadriceps samples. Whereas liver samples were sensitive to carcass preservation *via*  
327 slow- or snap-freeze, quadricep samples were not. There are a number of possible  
328 explanations for this. First, it could be due to the surface exposure of the quadriceps,  
329 which would lead to more rapid quenching of biochemical processes. Second, inherent  
330 differences in the transcript pool, mRNA half-lives, and enzymatic complement of liver  
331 and quadriceps could offer a biological answer. While we cannot distinguish between  
332 these mechanisms, our observations are consistent with previous results showing that  
333 post-mortem changes to mRNA is tissue-dependent (Inoue et al., 2002; Lee et al.,  
334 2005; Miyatake et al., 2004).

335 The poor transcript integrity in slow frozen carcasses sequenced with a polyA  
336 enrichment protocol was not evident in pre-sequencing QC analyses. Indeed, all  
337 samples had RIN values > 7 and there was no correlation between the gene expression  
338 differences and RIN. This distinguishes our results from previous studies showing a  
339 strong correlation between RIN values and loss of 5' coverage (Davila et al., 2016;  
340 Sigurgeirsson et al., 2014). Therefore, additional pre-sequencing QC analyses capable  
341 of detecting these issues would be useful. Low throughput sequencing is rapid,  
342 decreasing in cost, and being adopted as a QC step, but does not provide the coverage  
343 necessary to detect the biases seen here.

344 Alternatively, if effective pre-sequencing QC metrics cannot be developed, a number of  
345 analytical approaches could be utilized. In one category are methods that calculate

346 additional metrics such as mRIN ([Feng et al., 2015](#)) and TIN ([Wang et al., 2016](#)) to  
347 allow assessment transcript integrity and exclusion of problematic samples. In a second  
348 category are processes that account for variable transcript integrity by considering only  
349 reads that occur near the 3' end of transcripts ([Sigurgeirsson et al., 2014](#)), controlling for  
350 the effects of RIN using a linear model framework ([Gallego Romero et al., 2014](#)), or by  
351 calculating idealized coverage curves on a gene-by-gene basis and using these for  
352 normalization ([Xiong et al., 2019](#)). Additional analyses are necessary to determine if  
353 these approaches can mitigate the issue observed here.

354 While we do not have a complete picture of the mechanisms resulting in the apparent  
355 gene expression change resulting from slow carcass freezing, we were able to identify  
356 effective mitigation strategies. Foremost among these is the utilization of a ribodepletion  
357 protocol in place of polyA enrichment. In this study, ribodepletion resulted in more even  
358 gene body coverage and was not as sensitive to slow freezing of carcasses. This is in  
359 agreement with previous studies which found that ribodepletion is less prone to bias  
360 introduced by poor RNA quality ([Li et al., 2014](#)) and less prone to 3' coverage bias  
361 ([Schuierer et al., 2017](#)). Beyond this, we found that two carcass preservation methods  
362 generated acceptable results, with few DEGs and enriched GO terms when compared  
363 to the immediate dissection of tissues and preservation in liquid nitrogen — the *de facto*  
364 gold standard. The first is rapid freeze of carcasses in liquid nitrogen and subsequent  
365 storage at -80 °C, followed by partial thaw, dissection and tissue preservation in liquid  
366 nitrogen. While this led to some loss of 5' transcript coverage, it had the fewest DEGs

367 (515, adj.  $p < 0.05$  &  $|\text{Log}_2 \text{FC}| > 1.5$ ) and no enriched GO terms ( $\text{FDR} < 0.25$ ,  $\text{NOM} <$   
368  $0.01$ ) when compared to immediate dissection. Alternatively, segmentation of carcasses  
369 and immersion in *RNAlater* and subsequent storage at  $-80^\circ\text{C}$ , followed by partial thaw,  
370 dissection and tissue preservation in liquid nitrogen resulted in better maintenance of 5'  
371 transcript coverage but an increased number of DEGs (1952, adj.  $p < 0.05$  &  $|\text{Log}_2 \text{FC}|$   
372  $> 1.5$ ) although no GO terms were enriched ( $\text{FDR} < 0.25$ ,  $\text{NOM} < 0.01$ ). As euthanasia  
373 protocols can change serum biomarkers ([Pierozan et al., 2017](#)) and mRNA expression  
374 levels ([Staib-Lasarezik et al., 2014](#)), we were reassured to find that the euthanasia  
375 protocols used here did not affect gene expression in liver or quadriceps.

376 To conclude, our results indicate that care must be taken in choosing sample  
377 preservation protocols that preserve transcriptional patterns and other embedded  
378 information, but that are also feasible in resource constrained environments such as  
379 those found in space.

## 380 ***STAR Methods***

### 381 ***Rodent Research-1 (RR-1) Study***

#### 382 **Spaceflight Mission**

383 Rodent Research-1 (RR-1) was the first mission in which animals were maintained on  
384 the ISS for a long duration mission in the Rodent Habitat modified from heritage Animal  
385 Enclosure Module (AEM) hardware. Complete details were published previously (Choi  
386 et al., 2020). In short, RR-1 consisted of two experiments: ISS National Lab study (RR-1

387 CASIS) and NASA Validation study (RR-1 NASA). In the ISS National Lab Study, ten  
388 32-week-old female C57BL/6NTac mice (Taconic Biosciences, Rensselaer, NY) were  
389 flown to space for 20-21 days then euthanized via IP injection of pentobarbital/phenytoin  
390 (Euthasol®) and dissected onboard the ISS. Livers were dissected then inserted into  
391 cryovials, which were then frozen in a cold stowage container that was pre-chilled to -  
392 130 °C before transferring to the Minus Eighty-Degree Laboratory Freezer (MELFI) at  
393 the end of each dissection session (-80 °C). In the NASA Validation study, ten 16-week-  
394 old female C57BL/6J mice (Jackson laboratories, Bar harbor, ME) were flown to the ISS  
395 for 37 days before euthanasia and subsequent dissection. Due to crew time constraint,  
396 only two (out of ten) mice were dissected immediately after euthanasia via IP injection  
397 of pentobarbital/phenytoin (Euthasol®) to recover spleen and liver tissues on the ISS.  
398 Isolated livers were preserved by using the same method as the ISS National Lab study  
399 livers. The remaining eight animals were euthanized, then intact carcasses were  
400 wrapped in aluminum foil, put in Ziploc bags, placed in a pre-chilled cold stowage  
401 container and stored in the MELFI. For both the ISS National Lab study and the NASA  
402 Validation study, there were respective cohorts of age-matched basal animals which  
403 were euthanized one day after launch as a baseline control as well as age-matched  
404 ground control animals kept in an ISS Environmental Simulator at Kennedy Space  
405 Center (KSC) on a 4-day delay to mimic spaceflight conditions. In addition, the NASA  
406 Validation study also had a cohort of age-matched vivarium control animals that were  
407 housed in the vivarium cages and followed the same experimental timeline and process

408 as the spaceflight animals. A timeline indicating major events in the RR-1 mission is  
409 shown in Supplemental Figure 6.

#### 410 **Sample Collection**

411 The frozen intact carcasses from the NASA Validation study were partially thawed then  
412 dissected at NASA Ames Research Center upon return to Earth. One lobe of liver from  
413 each carcass was removed, immediately homogenized in RLT buffer (Qiagen, Valencia,  
414 CA) followed by snap freezing the tissue homogenates in LN<sub>2</sub>. Quadriceps were snap  
415 frozen upon collection. Tissues were stored at -80 °C until extraction.

#### 416 **RNA Isolation**

417 RNA was isolated from all liver and quadriceps samples using the following methods.  
418 For the liver samples, RNA was extracted with the AllPrep DNA/RNA Mini Kit (Qiagen,  
419 Valencia, CA) following the manufacturer's protocol. Briefly, homogenization buffer was  
420 made by adding 1:100 volume ratio of beta-mercaptoethanol to RLT buffer and kept on  
421 ice until use. Approximately 30 mg of tissue was cut using a sterile scalpel and  
422 immediately placed in 800 µL of the RLT buffer solution. Each sample was then  
423 homogenized for approximately 20 seconds at 21,000 RPM using a Polytron PT1300D  
424 handheld homogenizer with a 5 mm standard dispersing aggregate tip (Kinematica,  
425 Bohemia, NY). Homogenates were centrifuged for 3 minutes at room temperature at  
426 15,000 RPM to remove cell debris. The supernatant from each sample was used to  
427 isolate and purify RNA following the manufacturer's protocol including on-column DNase

428 treatment with RNase-free DNase (Qiagen, Valencia, CA). RNA was eluted twice per  
429 sample in 30  $\mu$ L RNase- and DNase-free H<sub>2</sub>O per elution. For quadriceps samples,  
430 RNA was extracted using TRIzol reagents (Thermo Fisher Scientific, Waltham, MA)  
431 according to the manufacturer's protocol, and the isolated RNA samples were then  
432 treated on column with RNase-free DNase (Qiagen, Valencia, CA) and RNeasy Mini kit  
433 (Qiagen, Valencia, CA). Concentration and absorbance ratios of all the isolated liver  
434 and quadriceps RNA samples were measured using the NanoDrop 2000  
435 spectrophotometer (Thermo Fisher Scientific, Waltham, MA). RNA quality was  
436 assessed using the Agilent 2100 Bioanalyzer with the Agilent RNA 6000 Nano Kit or  
437 Agilent RNA 6000 Pico Kit (Agilent Technologies, Santa Clara, CA).

#### 438 **Library Preparation and RNA-Sequencing**

439 Samples with RNA Integrity Number (RIN) of 6 or above were sent to the University of  
440 California (UC), Davis Genome Center where the libraries were constructed and RNA-  
441 sequencing was performed. All the RR-1 RNA-sequencing data analyzed in this  
442 manuscript were obtained from the NASA GeneLab Data Repository  
443 (<https://genelab.nasa.gov/>), including GLDS-47, GLDS-48, and GLDS-168. The RR-1  
444 liver RNA samples were sequenced twice. First, libraries were generated using the  
445 Illumina TruSeq Stranded RNA library prep kit (Illumina, San Diego, CA) after polyA  
446 selection, and sequencing was done with 50 bp single end reads on the Illumina HiSeq  
447 3000 platform (GLDS-47 and GLDS-48). Second, selected RNA samples were spiked  
448 in with ERCC ExFold RNA Spike-In Mixes (Thermo Fisher Scientific, Waltham, MA)

449 before shipping to the UC Davis Genome Center. Ribosomal RNA was removed with  
450 the Illumina RiboZero Gold ribodepletion kit then RNA sequencing libraries were  
451 constructed using the KAPA RNA HyperPrep kit (Roche, Basel, Switzerland) and the  
452 sequencing was done with 150 bp paired end reads on the Illumina HiSeq 4000  
453 platform (GLDS-168).

#### 454 ***Ground-based Tissue Preservation Study***

##### 455 **Animals**

456 20- to 21-week-old female C57BL/6J mice (Jackson laboratories, Bar harbor, ME) were  
457 shipped to the NASA Ames Research Center Animal Care Facility and were randomly  
458 housed in the standard vivarium cages with up to five mice per cage. The animals were  
459 acclimated for five days before the start of procedures to ensure recovery from the  
460 transportation stress. During acclimation, the animals were maintained on a 12h  
461 light/dark cycle and were provided with standard chow and water access *ad libitum*.  
462 One day before euthanasia, animal body weights were measured and used to distribute  
463 the animals into six groups (n=6/group) with similar average body weights. Animal  
464 health status, water and food intake were monitored daily. The study followed  
465 recommendations in the Guide for the Care and Use of Laboratory Animals (2011) and  
466 was approved on February 8, 2018 by the Institutional Animal Care and Use Committee  
467 (IACUC) at NASA Ames Research Center (Protocol number NAS-17-006-Y1).

## 468 **Animal Euthanasia and Dissection**

469 The detailed descriptions and rationale of each group are as follows as well as outlined  
470 in Figure S4 and Tables S1 and S2. Group 1 (M1-M6) animals were euthanized by  
471 intraperitoneal injection of pentobarbital/phenytoin (Euthasol®) (80 mg in 0.2 ml) (Virbac,  
472 West Lake, TX) followed by cervical dislocation. Dissection was performed immediately  
473 after euthanasia without freezing the carcasses. Left lobes of livers and quadriceps  
474 were subdivided into three sections and each tissue section was preserved either by  
475 freezing on dry ice, snap freezing in liquid nitrogen, or preserved in RNA/ater™ solution  
476 (Thermo Fisher Scientific, Waltham, WA). For the tissue sections preserved in  
477 RNA/ater™, tissue sections were submerged in RNA/ater™ at 4 °C for 3 days then  
478 frozen and stored at -80 °C. Note that this is the only group of animals that were  
479 dissected upon euthanasia. Carcasses from animals in subsequent groups were  
480 preserved intact using various methods then dissected at a later date. Group 1 tissue  
481 sections that were preserved by freezing on dry ice most closely mimics the process  
482 that was used to generate RR-1 NASA and CASIS immediate samples.

483 Group 2 (M7-M12) animals were euthanized by intraperitoneal injection of  
484 pentobarbital/phenytoin (Euthasol®) followed by cervical dislocation. The carcasses  
485 were wrapped in foil and preserved by freezing on dry ice, similar to the intact carcass  
486 preservation method used for the RR-1 NASA Validation Study. Once frozen, the  
487 carcasses were stored at -80 °C. On the day of dissection, mouse carcasses were  
488 removed from the -80 °C freezer and thawed at room temperature for 15 to 20 minutes



489 prior to dissection. Left lobes of livers were removed and divided into two: one piece  
490 was snap frozen in liquid nitrogen then stored at -80 °C; the other piece was  
491 homogenized in RLT buffer (Qiagen, Valencia, CA) and the tissue homogenate was  
492 snap frozen in liquid nitrogen then stored at -80 °C for 70 days before RNA extraction to  
493 simulate the process used to generate the RR-1 NASA “carcass” liver samples. This  
494 extended storage did not result in a substantial number of DEG (Figure S5E&F).  
495 Quadriceps were snap frozen in liquid nitrogen after dissection then stored at -80 °C.

496 Group 3 (M13-M18) animals were euthanized by intraperitoneal injection of  
497 pentobarbital/phenytoin (Euthasol®) followed by cervical dislocation. The intact  
498 carcasses were wrapped in foil and preserved by snap freezing in liquid nitrogen  
499 followed by storage at -80 °C. On the day of dissection, mouse carcasses were  
500 removed from the -80 °C freezer and thawed at room temperature for 15 to 20 minutes  
501 prior to dissection. Left lobes of livers and quadriceps were collected and snap frozen  
502 in liquid nitrogen then stored at -80 °C.

503 Group 4 (M19-M24) animals were euthanized by intraperitoneal injection of  
504 pentobarbital/phenytoin (Euthasol®) followed by cervical dislocation. The carcasses  
505 were sectioned into 3 sections, head, chest, and abdomen with tail removed and  
506 discarded and each part was submerged in RNA<sup>later</sup>™ solution (Thermo Fisher  
507 Scientific, Waltham, WA) and placed at 4 °C for 3 days to allow thorough permeation  
508 before being stored at -80 °C. On the day of dissection, mouse carcasses were  
509 removed from the -80 °C freezer and thawed at room temperature for 15 to 20 minutes

510 prior to dissection. Left lobes of livers and quadriceps were collected and snap frozen  
511 in liquid nitrogen then stored at -80 °C. This group was used to simulate the procedure  
512 done in the RR-7 mission and to test if gene expression signals could be better  
513 preserved using an RNA-specific preservative.

514 Group 5 (M25-30) animals were euthanized by intraperitoneal injection of  
515 ketamine/xylazine (10mg/mL / 3mg/mL in 0.3mL PBS) followed by cervical dislocation.  
516 The intact carcasses were wrapped in foil and preserved by freezing on dry ice then  
517 stored at -80 °C. On the day of dissection, mouse carcasses were removed from the -  
518 80 °C freezer and thawed at room temperature for 15 to 20 minutes prior to dissection.  
519 Left lobes of livers and quadriceps were collected and snap frozen in liquid nitrogen  
520 then stored at -80 °C. The euthanasia and preservation methods used in this group  
521 mimics the process used to generate RR-3 carcass liver samples (Smith et al., 2017).  
522 Ketamine/xylazine is currently the most common euthanasia method used in RR  
523 missions.

524 Group 6 (M31-M36) animals were euthanized by carbon dioxide inhalation followed by  
525 cervical dislocation. The carcasses were wrapped in foil and preserved by freezing on  
526 dry ice then stored at -80 °C. On the day of dissection, mouse carcasses were removed  
527 from the -80 °C freezer and thawed at room temperature for 15 to 20 minutes prior to  
528 dissection. Left lobes of livers and quadriceps were collected and snap frozen in liquid  
529 nitrogen then stored at -80 °C. This group represents the euthanasia method commonly

530 used in terrestrial laboratories and was used to evaluate any effects on gene expression  
531 due to the drug-induced euthanasia methods that have been used in RR missions.

## 532 **RNA Isolation**

533 RNA was isolated from partial left liver lobe and partial quadriceps muscle tissues using  
534 the AllPrep DNA/RNA Mini Kit (Qiagen, Valencia, CA). Briefly, homogenization buffer  
535 was made by adding 1:100 volume ratio of beta-mercaptoethanol to RLT buffer and  
536 kept on ice until use. On average, 48.85 mg of left liver lobe and 20.08 mg of left or right  
537 quadriceps was cut using a sterile scalpel and immediately placed in 600  $\mu$ L of the RLT  
538 buffer solution. Complete tissue dispersion was achieved using the hand-held Polytron  
539 PT1300D homogenizer with 5 mm standard dispersing aggregate by implementing 20  
540 second homogenization periods at a speed of 20,000 RPM. Homogenized samples  
541 were centrifuged for 3 minutes at room temperature at 15,000 RPM to remove cell  
542 debris. The supernatant from each sample was used to isolate and purify RNA following  
543 the manufacturer's protocol. RNA was treated with RNase-Free DNase (Qiagen,  
544 Valencia, CA) and eluted in 50  $\mu$ L of RNase- and DNase-free H<sub>2</sub>O molecular grade  
545 water. RNA concentration was measured using Qubit 3.0 Fluorimeter (Thermo Fisher  
546 Scientific, Waltham, MA). RNA quality was assessed using the Agilent 2100 Bioanalyzer  
547 with the Agilent RNA 6000 Nano Kit or Agilent RNA 6000 Pico Kit (Agilent  
548 Technologies, Santa Clara, CA).

## 549 **Library Preparation and Sequencing**

550 Three microliters of Mix 1 or Mix 2 of ERCC ExFold RNA Spike-In (Thermo Fisher  
551 Scientific, Waltham, MA) at a dilution of 1:100 was added to 1.5 µg aliquots of RNA  
552 immediately after extraction. The two mixes were randomly distributed within the six  
553 experimental groups. In addition, Universal Human and Mouse Reference RNA samples  
554 (Agilent Technologies, Santa Clara, CA) were included as control samples in the library  
555 construction and sequencing.

556 Library construction was performed using 500 ng of ERCC-spiked total RNA with an  
557 average RIN of 7.8 for liver samples and 9.8 for quadriceps samples. Total RNA was  
558 depleted of the ribosomal fraction and libraries were constructed with TruSeq Stranded  
559 Total RNA with Ribo-Zero Gold kit (Illumina, San Diego, CA). Libraries were indexed  
560 using 1.5 µM Unique Dual Index adapters with Unique Molecular Identifiers (Integrated  
561 DNA Technologies, Coralville, IA) and 15 cycles of amplification were performed to  
562 reach desired library concentration. Library size was assessed with 4200 TapeStation  
563 (Agilent Technologies, Santa Clara, CA), targeting average size of 300 nt.

564 Libraries were multiplexed then quantified using Universal qPCR Master Mix (Kapa  
565 Biosystems, Wilmington, MA). The library pool was sequenced on an iSeq 100  
566 (Illumina, San Diego, CA) to assess sample quality and pool balancing before large-  
567 scale sequencing. The final library pool (with 1% PhiX spike-in for instrument control)  
568 was sequenced on a NovaSeq 6000 using one S4 and one S2 Reagent Kit (Illumina,

569 San Diego, CA), paired-end and 149 bp reads, targeting 60 million clusters for each  
570 experimental sample.

### 571 ***RNA Sequencing Data Analysis***

572 Raw RNA sequence data from the RR-1 NASA Validation flight liver (GLDS-48 and  
573 GLDS-168) samples, RR-1 CASIS liver samples (GLDS-47), and the ground-based  
574 studies designed to simulate and assess spaceflight euthanasia, carcass and tissue  
575 preservation, and/or storage protocols, GLDS-49, GLDS-235, and GLDS-236 were  
576 analyzed using the GeneLab standard RNAseq analysis pipeline. First, adapters were  
577 removed with Cutadapt (v2.3) (Martin, 2011) using the Trim Galore! (v0.6.2) wrapper.  
578 Raw and trimmed read quality were evaluated with FastQC (v0.11.8), and MultiQC  
579 (v1.7) was used to generate MultiQC reports. *Mus musculus* STAR and RSEM  
580 references were built using STAR (v2.7.1a) and RSEM (v1.3.1) (Li and Dewey, 2011),  
581 respectively, with ensembl genome version mm10-GRCm38  
582 (*Mus\_musculus.GRCm38.dna.toplevel.fa*), and the following gtf annotation file:  
583 *Mus\_musculus.GRCm38.96.gtf*. Trimmed reads were aligned to the *Mus musculus*  
584 STAR reference with STAR (v2.7.1a) (Dobin et al., 2013) and aligned reads were  
585 quantified using RSEM (v1.3.1) (Li and Dewey, 2011).

586 The following samples were used for downstream analyses; GLDS-47: FLT and GC;  
587 GLDS-48: FLT-C, FLT-I, GC-C, and GC-I; GLDS-49: LN2-3d, LN2-1y, DI-1y; GLDS-  
588 168: RR1-FLT-wERCC and RR1-GC-wERCC; for GLDS-235 and GLDS-236, all  
589 samples indicated in Figure S4 and Tables S1 and S2 were included. For each GLDS

590 dataset, quantification data from select samples were imported to R (v3.6.0) with  
591 tximport (v1.14.0) (Soneson et al., 2016) and normalized with DESeq2 (v1.26.0) (Love  
592 et al., 2014). All ERCC genes were removed prior to normalization. Differential  
593 expression analysis was performed in R (v3.6.0) using DESeq2 (v1.26.0) (Love et al.,  
594 2014); all groups were compared using the Wald test and the likelihood ratio test was  
595 used to generate the F statistic p-value. Gene annotations were assigned using the  
596 following Bioconductor and annotation packages: STRINGdb (Szklarczyk et al., 2019),  
597 PANTHER.db (Muller, 2017), and org.Mm.eg.db (Carlson, 2017).

### 598 ***Transcript Integrity Analysis***

599 The geneBody\_coverage.py function from RSeQC (v3.0.1) (Wang et al., 2012) was  
600 used to assess coverage across the median 1000 expressed genes across all datasets.  
601 A transcript integrity metric was defined as the ratio between the coverage in a window  
602 corresponding to position 10-30% and 80-100% (relative to the entire gene length) and  
603 used in boxplots. To determine significance between groups the nonparametric Mann–  
604 Whitney U test was used as distributions were not normal.

### 605 ***Gene Set Enrichment Analysis***

606 Pairwise gene set enrichment analysis (GSEA) was performed on the normalized  
607 counts from select samples in GLDS-48, GLDS-168, GLDS-235, and GLDS-236 using  
608 the C5: Gene Ontology (GO) gene set (MSigDB v7.1) as described (Subramanian et al.,  
609 2005). All comparisons were performed using the phenotype permutation, except those

610 involving GLDS-48 immediate samples, which used the gene set permutation due to low  
611 sample size. The ranked lists of genes were defined by the signal-to-noise metric, and  
612 the statistical significance were determined by 1000 permutations of the gene set. FDR  
613  $\leq 0.25$  and FDR  $\leq 0.05$  were considered significant for comparisons using the  
614 phenotype and gene set permutations, respectively, according to the authors'  
615 recommendation.

### 616 ***Data Availability***

617 All sequencing data is available at NASA GeneLab ([www.genelab.nasa.gov](http://www.genelab.nasa.gov)) (Ray et al.,  
618 2019). polyA enrichment-based data from the RR-1 NASA Validation Mission samples  
619 are at GLDS-48 (Globus and Galazka, 2015). polyA enrichment-based data from the  
620 RR-1 CASIS samples are at GLDS-47 (Globus et al., 2015). Data from ground-based  
621 study of tissue storage conditions are at GLDS-49 (GeneLab, 2016). Ribodepletion-  
622 based resequencing data from the RR-1 NASA Validation Mission samples are at  
623 GLDS-168 (Galazka, 2018). Liver data from ground-based freezing study are at GLDS-  
624 235 (Galazka, 2019a). Quadriceps data from ground-based freezing study are at GLDS-  
625 236 (Galazka, 2019b).

### 626 **Acknowledgments**

627 We thank Rebecca A. Klotz and Vandana Verma for dissection instructions; Candice G.  
628 T. Tahimic for help with IACUC protocol drafting; Samrawit G. Gebre for help with  
629 sample processing. This work was funded by the NASA Space Biology program within

630 the NASA Science Mission Directorate's (SMD) Biological and Physical Sciences (BPS)  
631 Division.

### 632 **Author Contributions**

633 Formal analysis, A.S.M.B, H.F, J.M.G; Investigation, K.C., R.B.C, O.M., S.L.P, V.B.,  
634 M.T.D, Y.C., S.R.; Project administration, A.M.SB., S.V.C., J.M.G.; Visualization,  
635 A.M.SB, J.M.G; Writing—original draft, A.M.SB, S.V.C, J.M.G, S.L.P; Writing—review  
636 and editing, Y.C., A.M.SB, S.S.R., J.M.G., S.L.P; Conceptualization, S.L.P., J.M.G,  
637 S.V.C, S.S.R.; Data curation, A.M.SB., S.L.P., Y.C.

### 638 **Declaration of Interests**

639 The authors declare no competing interests.

### 640 **References**

641 Beheshti, A., Chakravarty, K., Fogle, H., Fazelinia, H., Silveira, W.A. da, Boyko, V.,  
642 Polo, S.-H.L., Saravia-Butler, A.M., Hardiman, G., Taylor, D., et al. (2019). Multi-omics  
643 analysis of multiple missions to space reveal a theme of lipid dysregulation in mouse  
644 liver. *Sci Rep* 9, 19195.

645 Cadena, S.M., Zhang, Y., Fang, J., Brachat, S., Kuss, P., Giorgetti, E., Stodieck, L.S.,  
646 Kneissel, M., and Glass, D.J. (2019). Skeletal muscle in MuRF1 null mice is not spared



647 in low-gravity conditions, indicating atrophy proceeds by unique mechanisms in space.  
648 Sci Rep 9, 9397.

649 Carlson, M. (2017). org.Mm.eg.db (Bioconductor).

650 Choi, S., Ray, H.E., Lai, S.-H., Alwood, J.S., and Globus, R.K. (2016). Preservation of  
651 Multiple Mammalian Tissues to Maximize Science Return from Ground Based and  
652 Spaceflight Experiments. PLoS ONE 11, e0167391.

653 Choi, S.Y., Saravia-Butler, A., Shirazi-Fard, Y., Leveson-Gower, D., Stodieck, L.S.,  
654 Cadena, S.M., Beegle, J., Solis, S., Ronca, A., and Globus, R.K. (2020). Validation of a  
655 New Rodent Experimental System to Investigate Consequences of Long Duration  
656 Space Habitation. Sci Rep 10, 2336.

657 Dobin, A., Davis, C.A., Schlesinger, F., Drenkow, J., Zaleski, C., Jha, S., Batut, P.,  
658 Chaisson, M., and Gingeras, T.R. (2013). STAR: ultrafast universal RNA-seq aligner.  
659 Bioinformatics 29, 15–21.

660 Galazka, J. (2018). RR-1 and RR-3 mouse liver transcriptomics with and without ERCC  
661 control RNA spike-ins.

662 Galazka, J. (2019a). Transcriptomic analysis of liver from mice subjected to simulated  
663 spaceflight euthanasia, freezing, and tissue preservation protocols.

664 Galazka, J. (2019b). Transcriptomic analysis of quadriceps from mice subjected to  
665 simulated spaceflight euthanasia, freezing, and tissue preservation protocols.

666 Garrett-Bakelman, F.E., Darshi, M., Green, S.J., Gur, R.C., Lin, L., Macias, B.R.,  
667 McKenna, M.J., Meydan, C., Mishra, T., Nasrini, J., et al. (2019). The NASA Twins  
668 Study: A multidimensional analysis of a year-long human spaceflight. *Science* 364.  
669 GeneLab, N. (2016). Multi-omic investigations of mouse liver subjected to simulated  
670 spaceflight freezing and storage protocols.  
671 Globus, R., and Galazka, J.M. (2015). Rodent Research-1 (RR1) NASA Validation  
672 Flight: Mouse liver transcriptomic, proteomic, and epigenomic data (NASA GeneLab).  
673 Globus, R., Cadena, S., and Galazka, J. (2015). Rodent Research-1 (RR1) National  
674 Lab Validation Flight: Mouse liver transcriptomic, proteomic, and epigenomic data.  
675 Grudzien-Nogalska, E., and Kiledjian, M. (2017). New insights into decapping enzymes  
676 and selective mRNA decay. *Wiley Interdiscip Rev RNA* 8.  
677 Guo, Y., Zhao, S., Sheng, Q., Guo, M., Lehmann, B., Pietenpol, J., Samuels, D.C., and  
678 Shyr, Y. (2015). RNAseq by Total RNA Library Identifies Additional RNAs Compared to  
679 Poly(A) RNA Library. *BioMed Research International* 2015, 1–9.  
680 Institute of Medicine (2008). Review of NASA’s Human Research Program Evidence  
681 Books: A Letter Report (Washington, D.C.: National Academies Press).  
682 Jonscher, K.R., Alfonso-Garcia, A., Suhaim, J.L., Orlicky, D.J., Potma, E.O., Ferguson,  
683 V.L., Bouxsein, M.L., Bateman, T.A., Stodieck, L.S., Levi, M., et al. (2016). Spaceflight  
684 Activates Lipotoxic Pathways in Mouse Liver. *PLoS ONE* 11, e0152877.

- 685 Kumar, A., Kankainen, M., Parsons, A., Kallioniemi, O., Mattila, P., and Heckman, C.A.  
686 (2017). The impact of RNA sequence library construction protocols on transcriptomic  
687 profiling of leukemia. *BMC Genomics* *18*, 629.
- 688 Li, B., and Dewey, C.N. (2011). RSEM: accurate transcript quantification from RNA-Seq  
689 data with or without a reference genome. *BMC Bioinformatics* *12*, 323.
- 690 Li, S., Tighe, S.W., Nicolet, C.M., Grove, D., Levy, S., Farmerie, W., Viale, A., Wright,  
691 C., Schweitzer, P.A., Gao, Y., et al. (2014). Multi-platform assessment of transcriptome  
692 profiling using RNA-seq in the ABRF next-generation sequencing study. *Nat Biotechnol*  
693 *32*, 915–925.
- 694 Love, M.I., Huber, W., and Anders, S. (2014). Moderated estimation of fold change and  
695 dispersion for RNA-seq data with DESeq2. *Genome Biol* *15*, 550.
- 696 Martin, M. (2011). Cutadapt removes adapter sequences from high-throughput  
697 sequencing reads. *EMBnet j.* *17*, 10.
- 698 Muller, J. (2017). PANTHER.db (Bioconductor).
- 699 Pecaut, M.J., Mao, X.W., Bellinger, D.L., Jonscher, K.R., Stodieck, L.S., Ferguson, V.L.,  
700 Bateman, T.A., Mohny, R.P., and Gridley, D.S. (2017). Is spaceflight-induced immune  
701 dysfunction linked to systemic changes in metabolism? *PLoS ONE* *12*, e0174174.

- 702 Petrova, O.E., Garcia-Alcalde, F., Zampaloni, C., and Sauer, K. (2017). Comparative  
703 evaluation of rRNA depletion procedures for the improved analysis of bacterial biofilm  
704 and mixed pathogen culture transcriptomes. *Sci Rep* 7, 41114.
- 705 Ray, S., Gebre, S., Fogle, H., Berrios, D.C., Tran, P.B., Galazka, J.M., and Costes, S.V.  
706 (2019). GeneLab: Omics database for spaceflight experiments. *Bioinformatics* 35,  
707 1753–1759.
- 708 Rettig, T.A., Ward, C., Pecaut, M.J., and Chapes, S.K. (2017). Validation of Methods to  
709 Assess the Immunoglobulin Gene Repertoire in Tissues Obtained from Mice on the  
710 International Space Station. *Gravit Space Res* 5, 2–23.
- 711 Ronca, A.E., Moyer, E.L., Talyansky, Y., Lowe, M., Padmanabhan, S., Choi, S., Gong,  
712 C., Cadena, S.M., Stodieck, L., and Globus, R.K. (2019). Behavior of mice aboard the  
713 International Space Station. *Sci Rep* 9, 4717.
- 714 Shen, H., Lim, C., Schwartz, A.G., Andreev-Andrievskiy, A., Deymier, A.C., and  
715 Thomopoulos, S. (2017). Effects of spaceflight on the muscles of the murine shoulder.  
716 *FASEB J.* 31, 5466–5477.
- 717 Siwaszek, A., Ukleja, M., and Dziembowski, A. (2014). Proteins involved in the  
718 degradation of cytoplasmic mRNA in the major eukaryotic model systems. *RNA Biology*  
719 11, 1122–1136.

720 Smith, R., Cramer, M., Globus, R., and Galazka, J. (2017). Rodent Research-3-CASIS:  
721 Mouse liver transcriptomic, proteomic, and epigenomic data.

722 Sonesson, C., Love, M.I., and Robinson, M.D. (2016). Differential analyses for RNA-seq:  
723 transcript-level estimates improve gene-level inferences. *F1000Res* 4, 1521.

724 Spatz, J.M., Ellman, R., Cloutier, A.M., Louis, L., van Vliet, M., Dwyer, D., Stolina, M.,  
725 Ke, H.Z., and Bouxsein, M.L. (2017). Sclerostin antibody inhibits skeletal deterioration in  
726 mice exposed to partial weight-bearing. *Life Sci Space Res (Amst)* 12, 32–38.

727 Subramanian, A., Tamayo, P., Mootha, V.K., Mukherjee, S., Ebert, B.L., Gillette, M.A.,  
728 Paulovich, A., Pomeroy, S.L., Golub, T.R., Lander, E.S., et al. (2005). Gene set  
729 enrichment analysis: A knowledge-based approach for interpreting genome-wide  
730 expression profiles. *Proceedings of the National Academy of Sciences* 102, 15545–  
731 15550.

732 Sultan, M., Amstislavskiy, V., Risch, T., Schuette, M., Dökel, S., Ralser, M., Balzereit,  
733 D., Lehrach, H., and Yaspo, M.-L. (2014). Influence of RNA extraction methods and  
734 library selection schemes on RNA-seq data. *BMC Genomics* 15, 675.

735 Szklarczyk, D., Gable, A.L., Lyon, D., Junge, A., Wyder, S., Huerta-Cepas, J.,  
736 Simonovic, M., Doncheva, N.T., Morris, J.H., Bork, P., et al. (2019). STRING v11:  
737 protein–protein association networks with increased coverage, supporting functional  
738 discovery in genome-wide experimental datasets. *Nucleic Acids Research* 47, D607–  
739 D613.

- 740 Tascher, G., Brioché, T., Maes, P., Chopard, A., O’Gorman, D., Gauquelin-Koch, G.,  
741 Blanc, S., and Bertile, F. (2017). Proteome-wide Adaptations of Mouse Skeletal Muscles  
742 during a Full Month in Space. *J. Proteome Res.* *16*, 2623–2638.
- 743 Wang, L., Wang, S., and Li, W. (2012). RSeQC: quality control of RNA-seq  
744 experiments. *Bioinformatics* *28*, 2184–2185.
- 745 Ward, C., Rettig, T.A., Hlavacek, S., Bye, B.A., Pecaut, M.J., and Chapes, S.K. (2018).  
746 Effects of spaceflight on the immunoglobulin repertoire of unimmunized C57BL/6 mice.  
747 *Life Sci Space Res (Amst)* *16*, 63–75.
- 748 Zhao, W., He, X., Hoadley, K.A., Parker, J.S., Hayes, D., and Perou, C.M. (2014).  
749 Comparison of RNA-Seq by poly (A) capture, ribosomal RNA depletion, and DNA  
750 microarray for expression profiling. *BMC Genomics* *15*, 419.
- 751 (2011). Guide for the care and use of laboratory animals.

## 752 **Figure Legends**

753 ***Figure 1. Gene expression differences in RR-1 NASA Validation flight liver***  
754 ***samples prepared via polyA selection (GLDS-48).*** A) Principal component analysis of  
755 global gene expression in RR-1 NASA spaceflight (FLT) and respective ground control  
756 (GC) liver samples dissected immediately after euthanasia (I) or from frozen carcasses  
757 (C). Percent variance for each principal component (PC) is shown. B) Venn diagram  
758 showing the number of similar and unique differentially expressed genes, spaceflight

759 (FLT) vs. ground control (GC), in Carcass (blue) and Immediate (red) samples (adj. p-  
760 value < 0.05).

761 **Figure 2. Enriched Gene Ontology (GO) terms between the RR-1 flight and ground**

762 **groups.** A) Enriched GO terms between the flight and ground control immediate  
763 samples (FLT-I vs. GC-I) identified by Gene Set Enrichment Analysis (get set  
764 permutation). B) Enriched GO terms between the flight and ground control carcass  
765 samples (FLT-C vs. GC-C) identified by Gene Set Enrichment Analysis (gene set  
766 permutation). In both A and B, positive or negative enrichment scores indicate higher  
767 expression in FLT-C or GC-C samples, respectively. Dot size indicates number of  
768 genes within GO term. Dot color indicates FDR. GO terms displayed met the thresholds  
769 of FDR < 0.05, NOM p < 0.01, gene set size > 40. C) Venn diagram of the number of  
770 enriched GO terms identified in Carcass (blue) and Immediate (red) samples when  
771 comparing FLT and GC samples. GO terms in Venn diagram met the threshold of FDR  
772 < 0.05, NOM p < 0.01.

773 **Figure 3. Gene expression changes and transcript integrity in Carcass vs.**

774 **Immediate RR-1 NASA liver samples.** A) Volcano plot showing 2,934 differentially  
775 expressed genes in all carcass (FLT-C and GC-C, all-C) versus all immediate (FLT-I  
776 and GC-I, all-I) samples (adj. p-value < 0.05 and  $1.5 < \text{Log}_2 \text{ fold change} < -1.5$ ). B)  
777 Common parent terms of enriched GO terms identified by Gene Set Enrichment  
778 Analysis of all carcass versus all immediate samples (phenotype normalized, FDR <  
779 0.3, NOM p < 0.01). C) Gene body coverage in Carcass (black) and Immediate (red)

780 FLT and GC samples. D) The percent coverage of the 5' and 3' shaded regions in panel  
781 C were used to calculate the 5' to 3' transcript integrity ratio for each sample. All  
782 Carcass and Immediate samples are grouped together (\*\* =  $p < 0.01$ , Mann–Whitney U  
783 test). E) Average expression of poly(A) removal genes in Carcass (blue) and Immediate  
784 (red) groups from RNAseq data. Cnot1, Cnot2, Cnot3, Cnot4, Cnot9, Cnot10, Cnot6,  
785 Cnot6l, Cnot7, and Cnot8 are part of the CCR4-NOT complex. Pan2 and Pan3 are part  
786 of the PAN2-PAN3 complex. Error bars indicate standard deviation (\* = adj.  $p < 0.05$ , \*\*  
787 = adj.  $p < 0.01$ , \*\*\* = adj.  $p < 0.001$ , ns = not significant, Wald test).

788 **Figure 4. Evaluation of gene expression and transcript integrity in RR-1 NASA**  
789 **carcass-dissected FLT and GC samples prepared via polyA selection and**  
790 **ribodepletion methods.** A) Principal component analysis of global gene expression in  
791 RR-1 NASA spaceflight (FLT) and ground control (GC) liver samples dissected from  
792 frozen carcasses and prepared via ribodepletion. Percent variance for each principal  
793 component (PC) is shown. B) Venn diagram of differentially expressed (DE) genes  
794 between spaceflight (FLT) and ground control (GC) samples prepared with ribodepletion  
795 (black) or polyA selection (red) methods (adj.  $p$ -value  $< 0.05$ ). C) Venn diagram of the  
796 number of similar and unique enriched GO terms identified in ribodepleted (black) and  
797 polyA selected (red) prepared samples (NOM  $p < 0.01$ , FDR  $< 0.5$ , phenotype  
798 permutation). D) Enriched GO terms between the flight and ground control carcass  
799 samples prepared with ribodepletion identified by Gene Set Enrichment Analysis  
800 (phenotype permutation). Positive or negative enrichment scores indicate higher



801 expression in FLT or GC samples, respectively. Dot size indicates number of genes  
802 within GO term. Dot color indicates FDR. GO terms displayed met the thresholds of  
803  $FDR < 0.5$ ,  $NOM\ p < 0.01$ ,  $1.6 < NES < -1.6$ . E) Gene body coverage of ribodepleted  
804 and polyA-selected FLT and GC carcass samples. F) The percent coverage of the 5'  
805 and 3' shaded regions were used to calculate the transcript integrity ratio for each  
806 sample (\*\*\*) =  $p < 0.001$ , Mann–Whitney U test).

807 **Figure 5. Gene expression and transcript integrity analysis of preservation**  
808 **methods for liver and quadriceps samples.** Liver and quadriceps samples were  
809 dissected from mice immediately after euthanasia with pentobarbital/phenytoin  
810 (Euthasol®) then preserved in dry ice (I\_DI), liquid nitrogen (I\_LN2), or RNA*later*<sup>TM</sup>  
811 (I\_RL) before RNAseq analysis. Alternatively, liver and quadriceps samples were  
812 dissected from partially thawed frozen carcasses of mice that were euthanized with  
813 pentobarbital/phenytoin (Euthasol®) then preserved in dry ice (C\_DI), liquid nitrogen  
814 (C\_LN2), or segmented into thirds and preserved in RNA*later*<sup>TM</sup> (C\_RL) before RNAseq  
815 analysis. A) Principal component analysis of liver samples. Percent variance for each  
816 principal component (PC) is shown. B) Uniformity of gene body coverage in liver  
817 samples. C) Principal component analysis of quadriceps samples. Percent variance for  
818 each principal component (PC) is shown. D) Uniformity of gene body coverage in  
819 quadriceps samples. (\*\*\*) =  $p < 0.001$ , \*\* =  $p < 0.01$ , \* =  $p < 0.05$ , ns = no significance,  
820 Mann–Whitney U test).

821 **Tables**

**Table 1. Comparisons of carcass preservation methods to immediate liquid nitrogen method on gene expression in livers.** The number of differentially expressed genes (DEG) and enriched gene ontology (GO) terms identified by Gene Set Enrichment Analysis (phenotype permutation) were evaluated pairwise in liver samples from different carcass preservation methods compared with immediate samples preserved in liquid nitrogen. For GO terms, number on the left corresponds to the group to the left of the ‘vs.’, and number on the right corresponds to the group to the right of the ‘vs.’ in the “Comparison” column. n numbers, p values, log2 fold changes, and FDR values are indicated. Euth=euthanasia by pentobarbital/phenytoin, I=tissue dissected immediately after euthanasia, C=tissue dissected from frozen carcass that has been partially thawed, DI=dry ice, LN2=liquid nitrogen, RL= RNA/ater™. Data are from GLDS-235.

| Comparison                                               | # DEG<br>(adj. p < 0.05) | # DEG<br>(adj. p < 0.05 &<br> Log2 FCI > 1.5) | # Enriched GO<br>terms<br>(NOM p < 0.01) | # Enriched GO<br>terms<br>(FDR < 0.5 &<br>NOM p < 0.01) | # Enriched GO<br>terms<br>(FDR < 0.25 &<br>NOM p < 0.01) |
|----------------------------------------------------------|--------------------------|-----------------------------------------------|------------------------------------------|---------------------------------------------------------|----------------------------------------------------------|
| <b>Euth_C_DI<br/>(n=6) vs.<br/>Euth_I_LN2<br/>(n=6)</b>  | 3798                     | 3143                                          | 16, 0                                    | 0, 0                                                    | 0, 0                                                     |
| <b>Euth_C_LN2<br/>(n=5) vs.<br/>Euth_I_LN2<br/>(n=6)</b> | 784                      | 515                                           | 30, 0                                    | 0, 0                                                    | 0, 0                                                     |
| <b>Euth_C_RL<br/>(n=5) vs.<br/>Euth_I_LN2<br/>(n=6)</b>  | 2118                     | 1952                                          | 22, 0                                    | 0, 0                                                    | 0, 0                                                     |

**Table 2. Comparisons of carcass preservation methods to immediate liquid nitrogen method on gene expression in quadriceps.** The number of differentially expressed genes (DEG) and enriched gene ontology (GO) terms identified by Gene Set Enrichment Analysis (phenotype permutation) were evaluated pairwise in quadriceps samples from different carcass preservation methods compared with immediate samples preserved in liquid nitrogen. For GO terms, the first number corresponds to the group to the left of the ‘vs.’, and the second number corresponds to the group to the right of the ‘vs.’ in the “Comparison” column. n numbers, p values, log<sub>2</sub> fold changes, and FDR values are indicated. Euth=euthanasia by pentobarbital/phenytoin, I=tissue dissected immediately after euthanasia, C=tissue dissected from frozen carcass that has been partially thawed, DI=dry ice, LN2=liquid nitrogen, RL=RNA/ater™. Data are from GLDS-236.

| Comparison                                  | # DEG<br>(adj. p < 0.05) | # DEG<br>(adj. p < 0.05<br>&  Log <sub>2</sub> FCI ><br>1.5) | # Enriched GO<br>terms<br>(NOM p < 0.01) | # Enriched GO<br>terms<br>(FDR < 0.5 &<br>NOM p < 0.01) | # Enriched GO<br>terms<br>(FDR < 0.25 &<br>NOM p < 0.01) |
|---------------------------------------------|--------------------------|--------------------------------------------------------------|------------------------------------------|---------------------------------------------------------|----------------------------------------------------------|
| Euth_C_DI (n=6)<br>vs. Euth_I_LN2<br>(n=6)  | 2                        | 0                                                            | 15, 17                                   | 0, 0                                                    | 0, 0                                                     |
| Euth_C_LN2 (n=6)<br>vs. Euth_I_LN2<br>(n=6) | 36                       | 24                                                           | 24, 24                                   | 0, 22                                                   | 0, 11 (26 with p <<br>0.05)                              |
| Euth_C_RL (n=6)<br>vs. Euth_I_LN2<br>(n=6)  | 2                        | 2                                                            | 30, 9                                    | 1, 2                                                    | 0, 0                                                     |

823

824 **Supplemental Information**

## 825 **Supplemental Figure Legends**

826 **Supplemental Figure 1. Carcass liver samples cluster together and away from immediate liver samples across**  
827 **datasets.** Principal component analysis containing data from RR-1 NASA spaceflight (FLT) and respective ground  
828 control (GC) carcass (FLT\_C\_48 and GC\_C\_48) and immediate (FLT\_I\_48 and GC\_I\_48) samples (GLDS-48),  
829 RR-1 CASIS FLT (FLT\_I\_47) and GC (GC\_I\_47) immediate samples (GLDS-47), and samples from a ground-  
830 based study in which livers were dissected immediately after euthanasia then frozen on either dry ice (DI) or  
831 submerged in liquid nitrogen (LN2) then stored at -80 °C for either 3 days (LN2\_I\_3d\_49) or 1 year (DI\_I\_1y\_49  
832 and LN2\_I\_1y\_49) prior to processing. Related to Figure 1.

833 **Supplemental Figure 2. RNA Integrity Number analysis of Carcass and Immediate Liver samples.** RNA  
834 Integrity Numbers (RIN) for spaceflight (FLT) and ground control (GC) immediate (I) and carcass (C) samples  
835 plotted against principal component 1 (PC1) calculated from gene expression data. Related to Figures 1&3.

836 **Supplemental Figure 3. Expression of decapping enzymes.** A) Average expression of decapping enzymes in  
837 Carcass (blue) and Immediate (red) groups. Error bars indicate standard deviation (\* = adj.  $p < 0.05$ , \*\* = adj.  $p <$   
838  $0.01$ , \*\*\* = adj.  $p < 0.001$ , ns = not significant, Wald test). Related to Figure 3.

839 **Supplemental Figure 4. Freezing study workflow.** Diagram of tissue preservation study to evaluate differences in  
840 indicated euthanasia, carcass and tissue preservation methods. Mice were euthanized with either  
841 pentobarbital/phenytoin (Euthasol®) or ketamine/xylazine injection, or CO<sub>2</sub> inhalation. Intact carcasses were  
842 preserved by freezing in liquid nitrogen or on dry ice, or by segmentation (head, chest, abdomen) and immersion in  
843 an ammonium sulfate solution (RNAlater™). Carcasses were then thawed and livers and quadriceps dissected and  
844 preserved in liquid nitrogen or guanidinium thiocyanate solution (Qiagen® RLT buffer). Alternatively, livers and  
845 quadriceps were dissected immediately and preserved by freezing in liquid nitrogen or on dry ice, or by immersion  
846 in an ammonium sulfate solution (RNAlater™). Related to Figure 5 and Tables 1&2.

847 **Supplemental Figure 5. Comparison of gene expression and gene ontology in liver and quadriceps samples**  
848 **derived from mice euthanized with different methods.** Liver and quadriceps samples dissected from partially  
849 thawed frozen carcasses of mice that were euthanized with pentobarbital/phenytoin (Euthasol®), ketamine/xylazine,  
850 or carbon dioxide inhalation were evaluated for global gene expression differences via principal component analysis  
851 (A, liver and B, quadriceps), and the number of differentially expressed genes (DEG) and enriched gene ontology  
852 (GO) terms identified by Gene Set Enrichment Analysis via pairwise comparisons (phenotype permutation) (C, liver  
853 and D, quadriceps). Liver samples dissected from partially thawed frozen carcasses of mice that were euthanized  
854 with pentobarbital/phenytoin (Euthasol®), then snap frozen in liquid nitrogen and stored at -80 °C or homogenized in  
855 RLT buffer then stored for 70 d at -80 °C were evaluated for E) global gene expression differences via principal  
856 component analysis, and F) the number of differentially expressed genes (DEG) and enriched gene ontology (GO)  
857 terms identified by Gene Set Enrichment Analysis (phenotype permutation) via pairwise comparisons with  
858 immediate samples preserved in liquid nitrogen or RNAlater. For GO terms, the number on the left corresponds to  
859 the group to the left of the 'vs.', and number on the right corresponds to the group to the right of the 'vs.' in the  
860 "Comparison" column. n numbers, p values, log<sub>2</sub> fold changes, and FDR values are indicated. Euth=euthanasia by  
861 pentobarbital/phenytoin (Euthasol®), Ket-Xyl= euthanasia by ketamine/xylazine, CO<sub>2</sub>=euthanasia by carbon dioxide  
862 inhalation, C=tissue dissected from frozen carcass that has been partially thawed, I=tissue dissected immediately  
863 after euthanasia, DI=dry ice, LN2=liquid nitrogen, RL=RNAlater™. Liver and quadriceps data are from GLDS-235  
864 and GLDS-236, respectively. Related to Figure 5 and Tables 1&2.

865 **Supplemental Figure 6. RR-1 mission timeline.** Timeline indicating major events in the Rodent Research-1 (RR-  
866 1) mission relative to the launch date (L). A minus sign (-) indicates time in days (d) before launch and a plus sign  
867 (+) indicates time in days (d) or months (m) after launch. Age-matched ground control animals were processed on  
868 similar timeline but on a 4-day delay to mimic spaceflight conditions. KSC = Kennedy Space Center; ISS =  
869 International Space Station; CASIS = Center for the Advancement of Science in Space; NASA = National  
870 Aeronautics and Space Administration. Related to Figures 1-4.

871 **Supplemental Figure 7. GLDS-49 Experimental Design.** Diagram of the ground-based preservation study  
 872 comparing livers collected using standard laboratory protocols with livers collected from simulated spaceflight  
 873 dissection flow and storage methods. Liver samples from twelve-week old female C57BL/6J mice were either snap  
 874 frozen (n=3), snap frozen after a 25 min delay and stored for 3 days (n=3), or snap frozen after a 25 min delay and  
 875 stored for 1 year (n=3). RNA-seq data were then generated using a polyA enrichment protocol. Related to Figure 1.

876 **Supplementary Tables**

**Table S1. Liver samples analyzed in the ground-based tissue preservation study. Related to Figure 5A&B and Table 1.**

| Group | Euthanasia              | Carcass preservation   | Tissue preservation          | Mouse ID |
|-------|-------------------------|------------------------|------------------------------|----------|
| 1     | Pentobarbital/phenytoin | None                   | Liquid nitrogen n=6          | M1-M6    |
|       |                         |                        | RNAlater™ n=6                |          |
|       |                         |                        | Dry ice n=6                  |          |
| 2     | Pentobarbital/phenytoin | Dry ice                | Liquid nitrogen n=6          | M7-M12   |
|       |                         |                        | RLT buffer 70d at -80 °C n=4 |          |
| 3     | Pentobarbital/phenytoin | Liquid nitrogen        | Liquid nitrogen n=5          | M13-M18  |
| 4     | Pentobarbital/phenytoin | RNAlater™ <sup>a</sup> | Liquid nitrogen n=5          | M19-M24  |
| 5     | Ketamine/xylazine       | Dry ice                | Liquid nitrogen n=6          | M25-M30  |
| 6     | Carbon dioxide          | Dry ice                | Liquid nitrogen n=6          | M31-M36  |

**a. Post carcass segmentation**

877

**Table S2. Quadriceps samples analyzed in the ground-based tissue preservation study. Related to Figure 5C&D and Table 2.**

| Group | Euthanasia | Carcass preservation | Tissue preservation | Mouse ID |
|-------|------------|----------------------|---------------------|----------|
|       |            |                      | Liquid nitrogen n=6 |          |

|   |                         |                        |                     |         |
|---|-------------------------|------------------------|---------------------|---------|
| 1 | Pentobarbital/phenytoin | None                   | RNAlater™ n=6       | M1-M6   |
|   |                         |                        | Dry ice n=6         |         |
| 2 | Pentobarbital/phenytoin | Dry ice                | Liquid nitrogen n=6 | M7-M12  |
| 3 | Pentobarbital/phenytoin | Liquid nitrogen        | Liquid nitrogen n=6 | M13-M18 |
| 4 | Pentobarbital/phenytoin | RNAlater™ <sup>a</sup> | Liquid nitrogen n=6 | M19-M24 |
| 5 | Ketamine/xylazine       | Dry ice                | Liquid nitrogen n=6 | M25-M30 |
| 6 | Carbon dioxide          | Dry ice                | Liquid nitrogen n=6 | M31-M36 |

**a. Post carcass segmentation**

878

**Table S3. Comparisons of immediate preservation methods on gene expression in livers. The number of differentially expressed genes (DEG) and enriched gene ontology (GO) terms identified by Gene Set Enrichment Analysis (phenotype permutation) were evaluated pairwise in liver samples from different immediate preservation methods. For GO terms, the first number corresponds to the group to the left of the ‘vs.’, and second number corresponds to the group to the right of the ‘vs.’ in the “Comparison” column. n numbers, p values, log2 fold changes, and FDR values are indicated. Euth=euthanasia by pentobarbital/phenytoin, I=tissue dissected immediately after euthanasia, DI=dry ice, LN2=liquid nitrogen, RL=RNAlater™. Data are from GLDS-235. Related to Figure 5A&B and Table 1.**

| Comparison                           | # DEG           | # DEG                             | # Enriched GO terms | # Enriched GO terms        | # Enriched GO terms         |
|--------------------------------------|-----------------|-----------------------------------|---------------------|----------------------------|-----------------------------|
|                                      | (adj. p < 0.05) | (adj. p < 0.05 &  Log2 FC  > 1.5) | (NOM p < 0.01)      | (FDR < 0.5 & NOM p < 0.01) | (FDR < 0.25 & NOM p < 0.01) |
| Euth_I_DI (n=6) vs. Euth_I_LN2 (n=6) | 16              | 16                                | 31, 6               | 7, 0                       | 0, 0                        |
| Euth_I_DI (n=6) vs. Euth_I_RL (n=6)  | 0               | 0                                 | 14, 8               | 0, 0                       | 0, 0                        |
| Euth_I_LN2 (n=6) vs. Euth_I_RL (n=6) | 14              | 14                                | 3, 15               | 0, 0                       | 0, 0                        |

879

**Table S4. Comparisons of carcass preservation methods to immediate RNAlater™ method on gene expression in livers. The number of differentially expressed genes (DEG) and enriched gene ontology (GO) terms identified by Gene Set Enrichment Analysis (phenotype permutation) were evaluated pairwise in liver samples from different carcass preservation methods compared with immediate samples preserved in RNAlater™. For GO terms, the first number corresponds to the group to the left of the ‘vs.’, and the second number corresponds to the group to the right of the ‘vs.’ in the “Comparison” column. n numbers, p values, log2 fold changes, and FDR values are indicated. Euth=euthanasia by pentobarbital/phenytoin, I=tissue dissected immediately after euthanasia, C=tissue dissected from frozen carcass that has been partially thawed, DI=dry ice, LN2=liquid nitrogen, RL= RNAlater™. Data are from GLDS-235. Related to Figure 5A&B and Table 1.**

| Comparison                              | # DEG<br>(adj. p < 0.05) | # DEG<br>(adj. p < 0.05 &  Log2 FC  > 1.5) | # Enriched GO terms<br>(NOM p < 0.01) | # Enriched GO terms<br>(FDR < 0.5 & NOM p < 0.01) | # Enriched GO terms<br>(FDR < 0.25 & NOM p < 0.01) |
|-----------------------------------------|--------------------------|--------------------------------------------|---------------------------------------|---------------------------------------------------|----------------------------------------------------|
| Euth_C_DI (n=6)<br>vs. Euth_I_RL (n=6)  | 930                      | 718                                        | 40, 1                                 | 1, 0                                              | 1, 0                                               |
| Euth_C_LN2 (n=5)<br>vs. Euth_I_RL (n=6) | 197                      | 118                                        | 90, 0                                 | 2, 0                                              | 0, 0                                               |
| Euth_C_RL (n=5)<br>vs. Euth_I_RL (n=6)  | 131                      | 123                                        | 65, 0                                 | 0, 0                                              | 0, 0                                               |

880

**Table S5. Comparisons of immediate preservation methods on gene expression in quadriceps. The number of differentially expressed genes (DEG) and enriched gene ontology (GO) terms identified by Gene Set Enrichment Analysis (phenotype permutation) were evaluated pairwise in quadriceps samples from different immediate preservation methods. For GO terms, number on the left corresponds to the group to the left of the ‘vs.’, and number on the right corresponds to the group to the right of the ‘vs.’ in the “Comparison” column. n numbers, p values, log2 fold changes, and FDR values are indicated. Euth=euthanasia by pentobarbital/phenytoin, I=tissue dissected immediately after euthanasia, DI=dry ice, LN2=liquid nitrogen, RL= RNAlater™. Data are from GLDS-236. Related to Figure 5C&D and Table 2.**

| Comparison | # DEG<br>(adj. p < 0.05) | # DEG<br>(adj. p < 0.05 &  Log2 FC  > 1.5) | # Enriched GO terms<br>(NOM p < 0.01) | # Enriched GO terms<br>(FDR < 0.5 & NOM p < 0.01) | # Enriched GO terms<br>(FDR < 0.25 & NOM p < 0.01) |
|------------|--------------------------|--------------------------------------------|---------------------------------------|---------------------------------------------------|----------------------------------------------------|
|------------|--------------------------|--------------------------------------------|---------------------------------------|---------------------------------------------------|----------------------------------------------------|

|                                                     |    |   |        |       |      |
|-----------------------------------------------------|----|---|--------|-------|------|
| <b>Euth_I_DI (n=6)<br/>vs. Euth_I_LN2<br/>(n=6)</b> | 2  | 1 | 2, 51  | 1, 2  | 0, 2 |
| <b>Euth_I_DI (n=6)<br/>vs. Euth_I_RL<br/>(n=6)</b>  | 14 | 9 | 25, 26 | 6, 0  | 2, 0 |
| <b>Euth_I_LN2<br/>(n=6) vs.<br/>Euth_I_RL (n=6)</b> | 0  | 0 | 66, 3  | 51, 0 | 0, 0 |

881

**Table S6. Comparisons of carcass preservation methods to immediate RNAlater™ method on gene expression in quadriceps. The number of differentially expressed genes (DEG) and enriched gene ontology (GO) terms identified by Gene Set Enrichment Analysis (phenotype permutation) were evaluated pairwise in quadriceps samples from different carcass preservation methods compared with immediate samples preserved in RNAlater™. For GO terms, number on the left corresponds to the group to the left of the ‘vs.’, and number on the right corresponds to the group to the right of the ‘vs.’ in the “Comparison” column. n numbers, p values, log2 fold changes, and FDR values are indicated. Euth=euthanasia by pentobarbital/phenytoin, I=tissue dissected immediately after euthanasia, C=tissue dissected from frozen carcass that has been partially thawed, DI=dry ice, LN2=liquid nitrogen, RL= RNAlater™. Data are from GLDS-236. Related to Figure 5C&D and Table 2.**

| <b>Comparison</b>                                   | <b># DEG<br/>(adj. p &lt; 0.05)</b> | <b># DEG<br/>(adj. p &lt; 0.05 &amp;<br/> Log2 FC  &gt; 1.5)</b> | <b># Enriched GO<br/>terms<br/>(NOM p &lt; 0.01)</b> | <b># Enriched GO<br/>terms<br/>(FDR &lt; 0.5 &amp;<br/>NOM p &lt; 0.01)</b> | <b># Enriched GO<br/>terms<br/>(FDR &lt; 0.25 &amp;<br/>NOM p &lt; 0.01)</b> |
|-----------------------------------------------------|-------------------------------------|------------------------------------------------------------------|------------------------------------------------------|-----------------------------------------------------------------------------|------------------------------------------------------------------------------|
| <b>Euth_C_DI (n=6)<br/>vs. Euth_I_RL<br/>(n=6)</b>  | 50                                  | 27                                                               | 80, 5                                                | 67, 1                                                                       | 33 (41 with p <<br>0.05), 0                                                  |
| <b>Euth_C_LN2<br/>(n=6) vs.<br/>Euth_I_RL (n=6)</b> | 282                                 | 139                                                              | 54, 8                                                | 4, 0                                                                        | 0, 0                                                                         |
| <b>Euth_C_RL<br/>(n=6) vs.<br/>Euth_I_RL (n=6)</b>  | 59                                  | 40                                                               | 135, 3                                               | 135, 1                                                                      | 34 (41 with p <<br>0.05), 0                                                  |

882



## 883 **Supplemental Materials and Methods**

### 884 **GLDS-49 Ground-based Freezing Study**

885 To compare standard laboratory protocols for tissue freezing and storage with a spaceflight timeline-simulated liver  
886 dissection and long-term storage, liver samples from twelve-week old female C57BL/6J mice (Jackson laboratories,  
887 Bar harbor, ME) were either immediately snap frozen (in liquid nitrogen), snap frozen after a 25 min delay and  
888 stored for 3 days, or snap frozen after a 25 min delay and stored for 1 year (Figure S7).

#### 889 *Sample Collection*

890 The liver tissues of twelve-week-old C57BL/6J mice (Jackson laboratories, Bar harbor, ME) were received from the  
891 Rodent Research project collected in a ground-based preservation and storage study (Choi et al., 2016). Three  
892 groups of livers were included: 1) Liver tissues dissected and frozen on dry ice 25 min after euthanizing with  
893 pentobarbital/phenytoin (Euthasol®) followed by cervical dislocation. At the time of RNA extraction, the liver  
894 tissues had been stored at -80 °C for around 1-year (DI\_I\_1y\_49); 2) Liver tissues dissected 3 min after euthanizing  
895 with pentobarbital/phenytoin (Euthasol®) followed by cervical dislocation and snap-freezing in liquid nitrogen. At  
896 the time of RNA extraction, the liver tissues had been stored at -80 °C for around 1-year (LN\_I\_1y\_49); 3) Liver  
897 tissues dissected 3 minutes after euthanizing with pentobarbital/phenytoin (Euthasol®) followed by cervical  
898 dislocation and snap-freezing in liquid nitrogen. At the time of RNA extraction, the liver tissues had been stored at -  
899 80 °C for only 3 days (LN\_I\_3d\_49). This group served as a positive control for delayed dissection and long-term  
900 storage.

#### 901 *RNA Isolation*

902 RNA was isolated using the AllPrep DNA/RNA Mini Kit (Qiagen, Valencia, CA) following the manufacturer's  
903 protocol. Briefly, homogenization buffer was made by adding 1:100 volume ratio of beta-mercaptoethanol to RLT  
904 buffer and kept on ice until use. Approximately 30 mg of tissue was cut using a sterile scalpel and immediately  
905 placed in 800 µL of the RLT buffer solution. Each sample was then homogenized for approximately 20 seconds at  
906 21,000 RPM using a Polytron PT1300D handheld homogenizer with a 5 mm standard dispersing aggregate tip  
907 (Kinematica, Bohemia, NY). Homogenates were centrifuged for 3 minutes at room temperature at 15,000 RPM to  
908 remove cell debris. The supernatant from each sample was used to isolate and purify RNA following the  
909 manufacturer's protocol including on-column DNase treatment with RNase-free DNase (Qiagen, Valencia, CA).  
910 RNA was eluted twice per sample in 30 µL RNase- and DNase-free H<sub>2</sub>O per elution. Concentration and absorbance  
911 ratios were measured using the NanoDrop 2000 spectrophotometer (Thermo Fisher Scientific, Waltham, MA). RNA  
912 quality was assessed using the Agilent 2100 Bioanalyzer with the Agilent RNA 6000 Nano Kit (Agilent  
913 Technologies, Santa Clara, CA).

#### 914 *Library Preparation and RNA-Sequencing*

915 Samples with RNA Integrity Number (RIN) of 9 or above were sent to the University of California (UC), Davis  
916 Genome Center where the libraries were constructed and RNA-sequencing was performed. Libraries were generated  
917 using the Illumina TruSeq Stranded RNA library prep kit (Illumina, San Diego, CA) after polyA selection, and  
918 sequencing was done with 50 bp single end reads on the Illumina HiSeq 3000 platform.

919

920

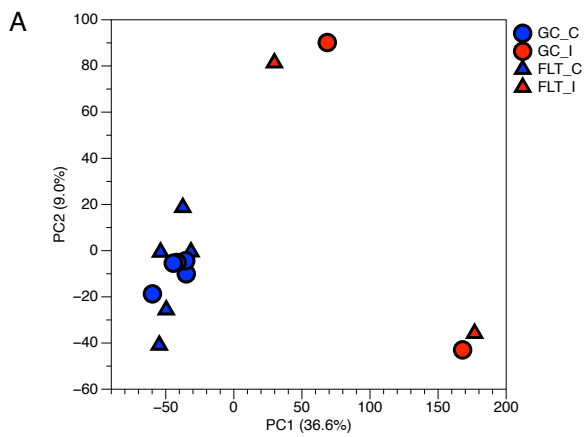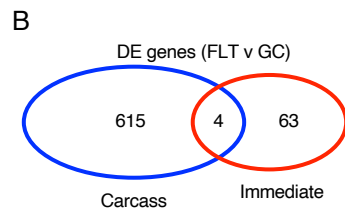

A

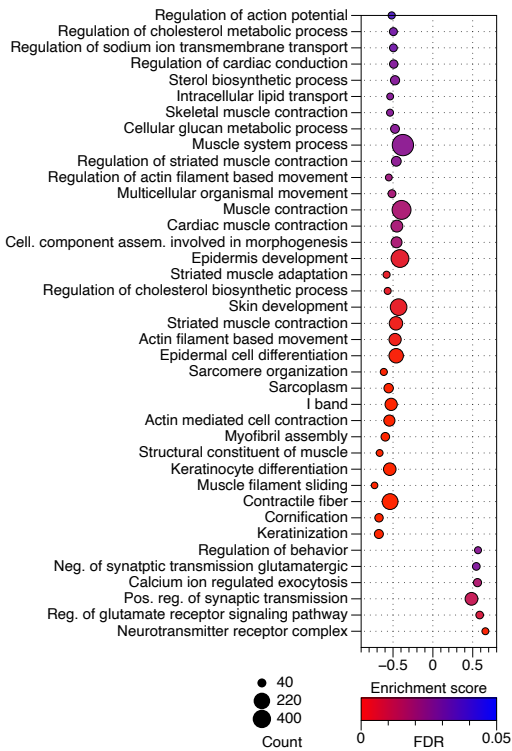

B

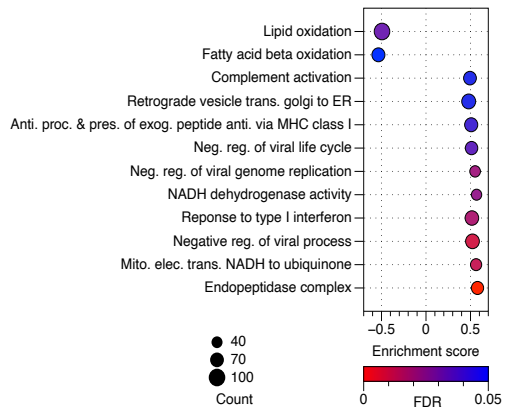

C

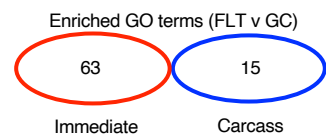

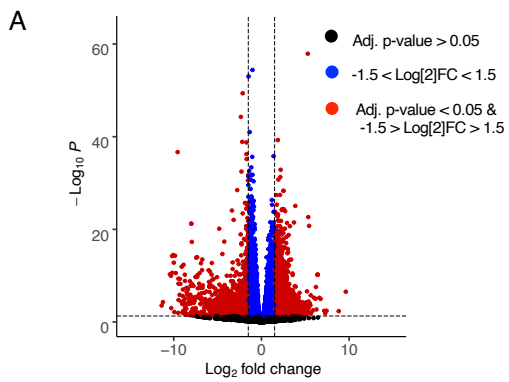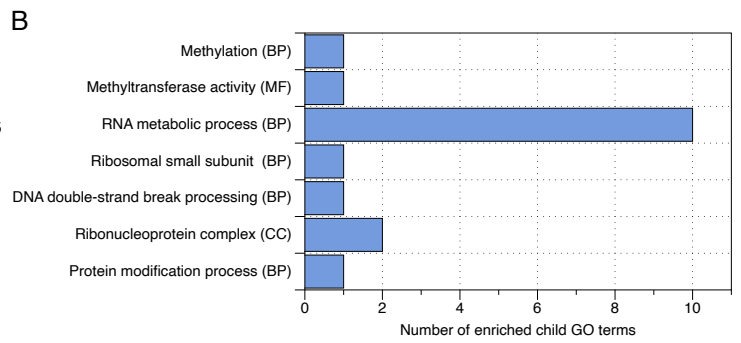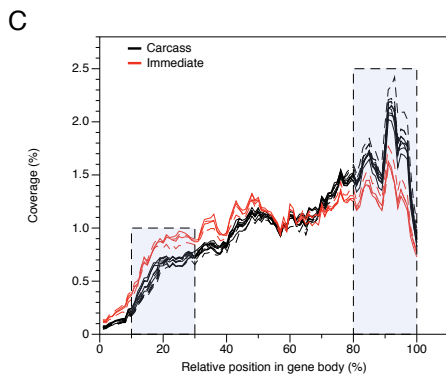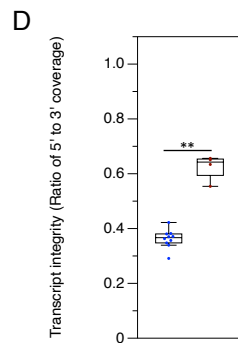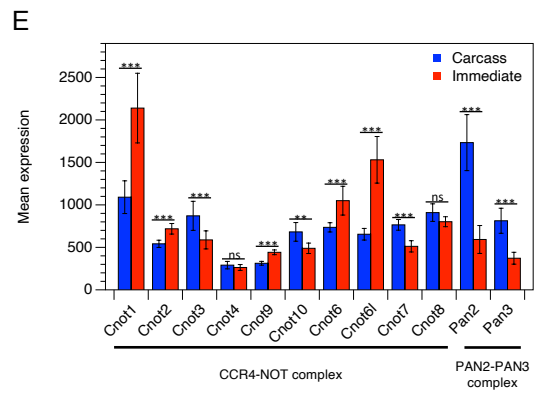

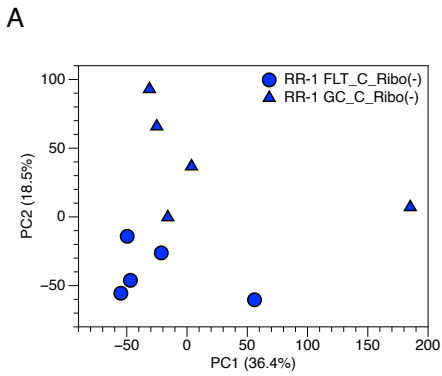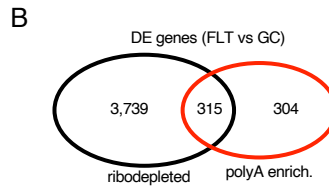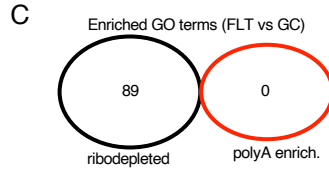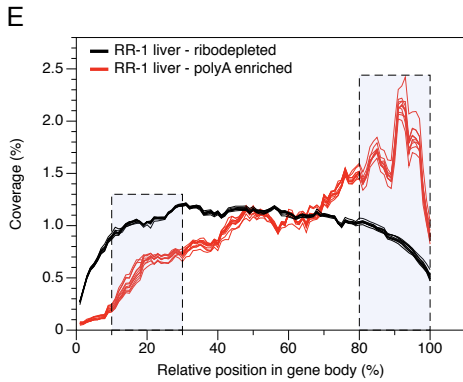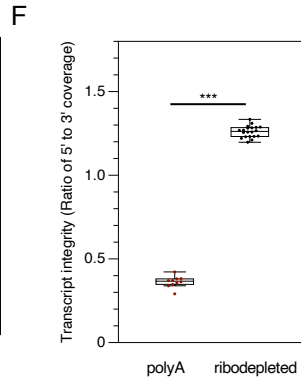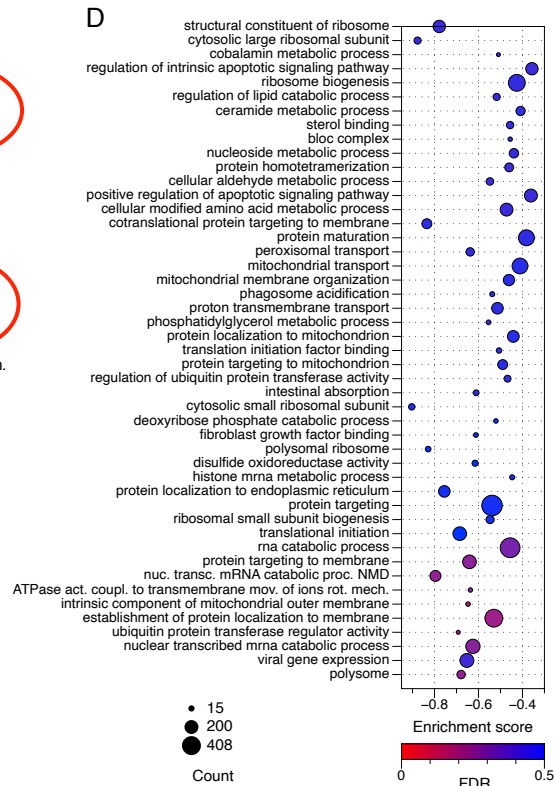

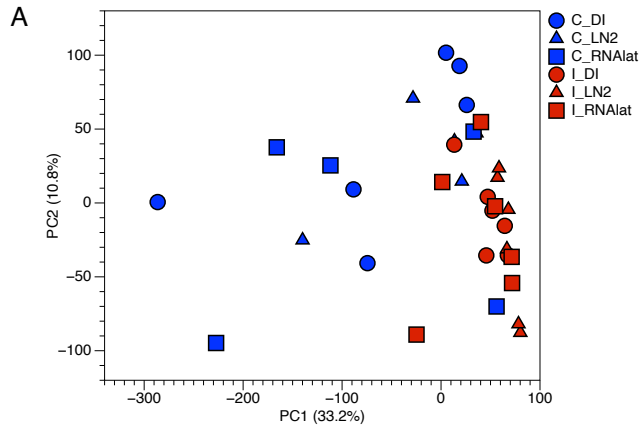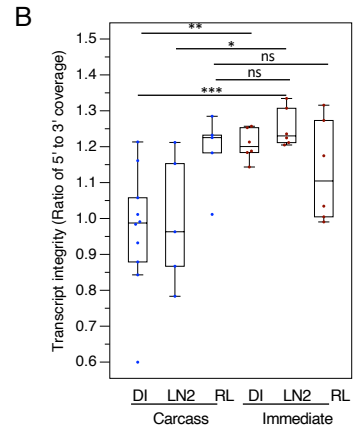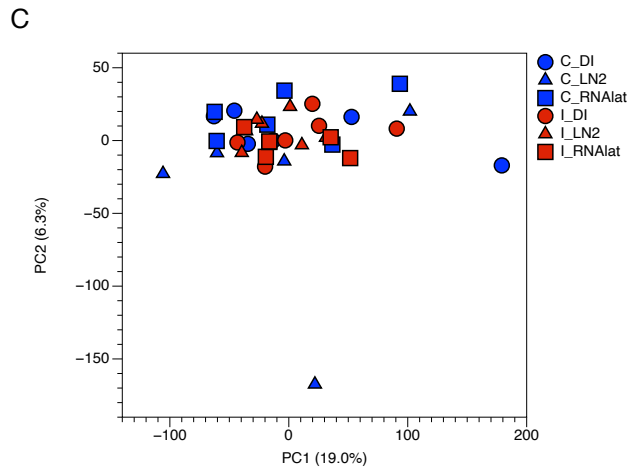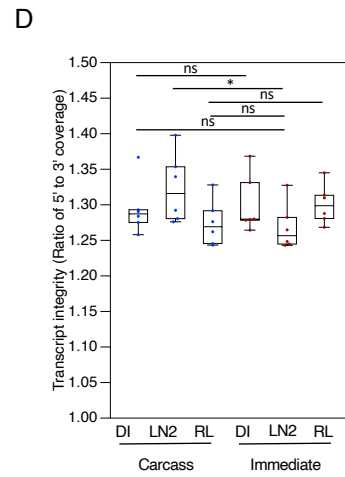

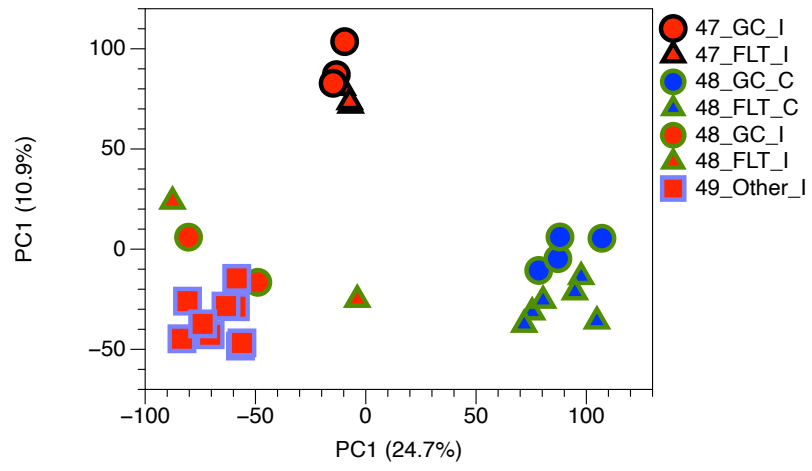

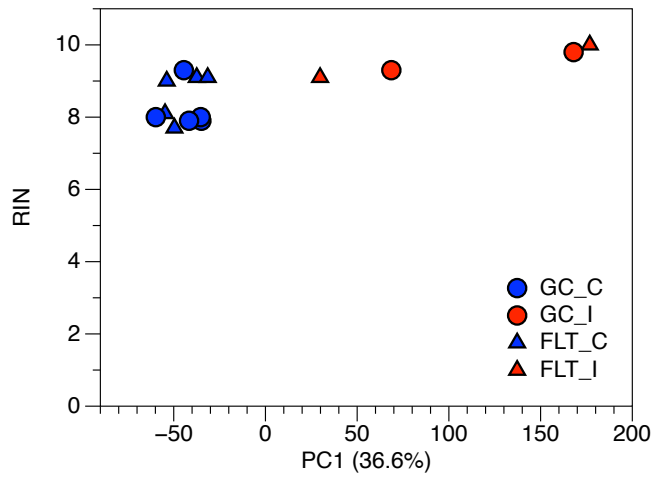



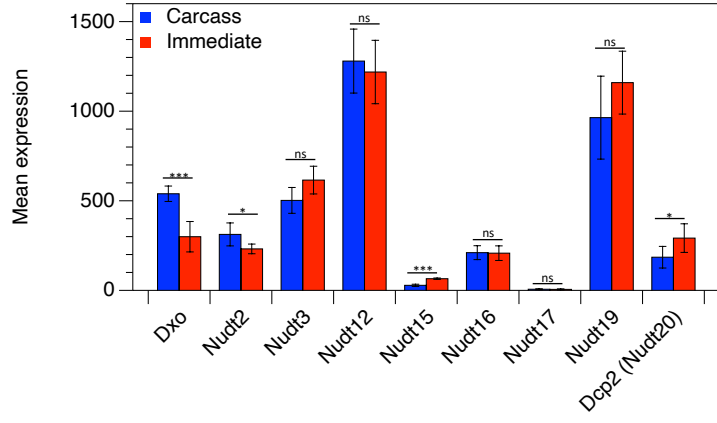

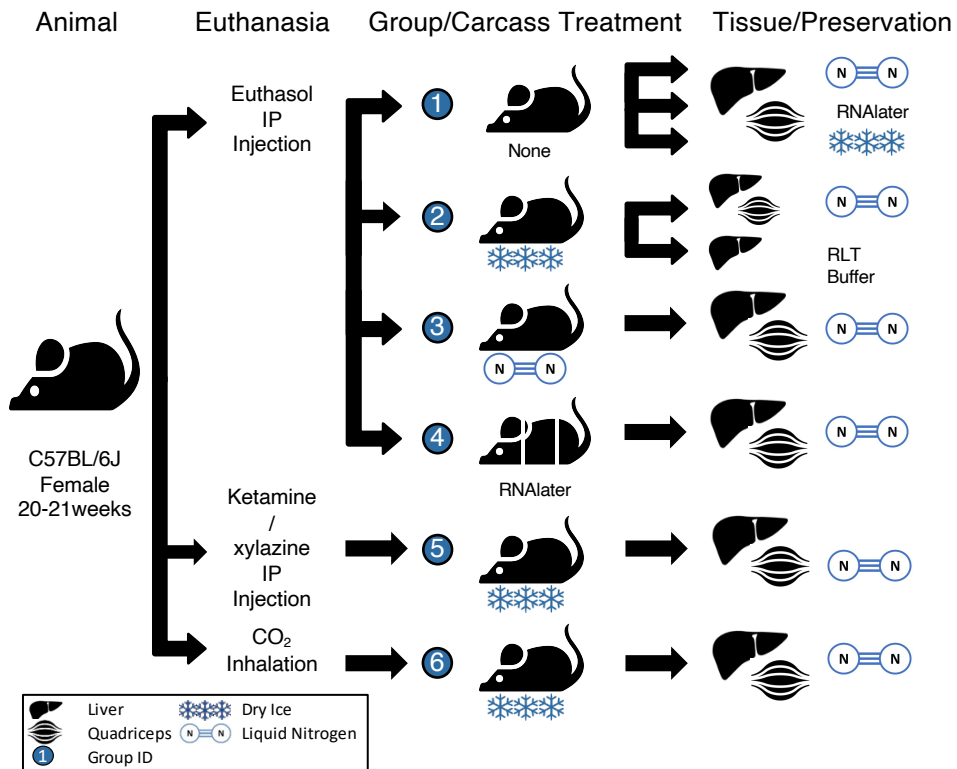

A

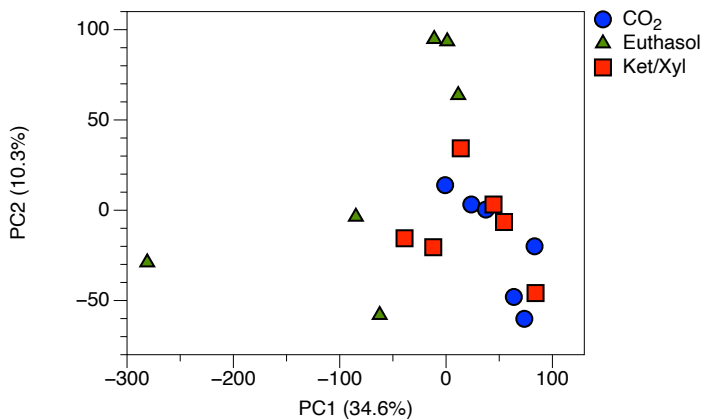

B

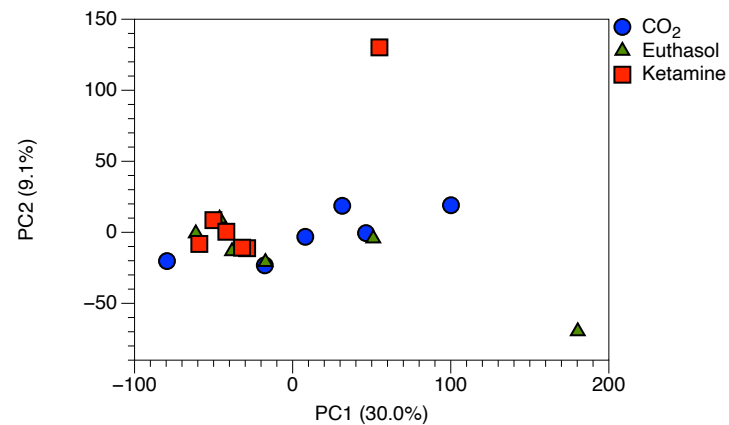

C

### Comparison of euthanasia methods for Carcass liver samples

| Comparison                                       | # DEG<br>(adj. p < 0.05) | # DEG<br>(adj. p < 0.05 &  Log <sub>2</sub> FCI > 1.5) | # Enriched GO terms<br>(NOM p < 0.01) | # Enriched GO terms<br>(FDR < 0.5 & NOM p < 0.01) | # Enriched GO terms<br>(FDR < 0.25 & NOM p < 0.01) |
|--------------------------------------------------|--------------------------|--------------------------------------------------------|---------------------------------------|---------------------------------------------------|----------------------------------------------------|
| CO <sub>2</sub> _C_DI (n=6) v Euth_C_DI (n=6)    | 192                      | 168                                                    | 0, 42                                 | 0, 0                                              | 0, 0                                               |
| CO <sub>2</sub> _C_DI (n=6) v Ket-Xyl_C_DI (n=6) | 0                        | 0                                                      | 0, 51                                 | 0, 0                                              | 0, 0                                               |
| Euth_C_DI (n=6) v Ket-Xyl_C_DI (n=6)             | 67                       | 49                                                     | 37, 0                                 | 1, 0                                              | 0, 0                                               |

D

### Comparison of euthanasia methods for Carcass quadriceps samples

| Comparison                                       | # DEG<br>(adj. p < 0.05) | # DEG<br>(adj. p < 0.05 &  Log <sub>2</sub> FCI > 1.5) | # Enriched GO terms<br>(NOM p < 0.01) | # Enriched GO terms<br>(FDR < 0.5 & NOM p < 0.01) | # Enriched GO terms<br>(FDR < 0.25 & NOM p < 0.01) |
|--------------------------------------------------|--------------------------|--------------------------------------------------------|---------------------------------------|---------------------------------------------------|----------------------------------------------------|
| CO <sub>2</sub> _C_DI (n=6) v Euth_C_DI (n=6)    | 2                        | 2                                                      | 8, 23                                 | 2, 0                                              | 1, 0                                               |
| CO <sub>2</sub> _C_DI (n=6) v Ket-Xyl_C_DI (n=6) | 0                        | 0                                                      | 5, 100                                | 2, 99                                             | 0, 4                                               |
| Euth_C_DI (n=6) v Ket-Xyl_C_DI (n=6)             | 3                        | 3                                                      | 3, 64                                 | 0, 10                                             | 0, 0                                               |

E

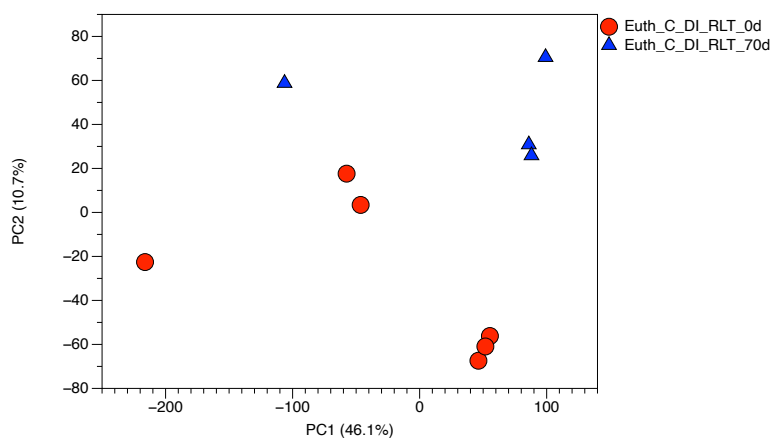

F

### Tissue storage methods vs. RNAIat and LN2 preserved Immediate liver samples

| Comparison                                       | # DEG<br>(adj. p < 0.05) | # DEG<br>(adj. p < 0.05 &  Log <sub>2</sub> FCI > 1.5) | # Enriched GO terms<br>(NOM p < 0.01) | # Enriched GO terms<br>(FDR < 0.5 & NOM p < 0.01) | # Enriched GO terms<br>(FDR < 0.25 & NOM p < 0.01) |
|--------------------------------------------------|--------------------------|--------------------------------------------------------|---------------------------------------|---------------------------------------------------|----------------------------------------------------|
| Euth_C_DI_RLT-70d (n=4) v Euth_C_DI_RLT-0d (n=6) | 284                      | 174                                                    | 3, 110                                | 0, 31                                             | 0, 2                                               |
| Euth_C_DI_RLT-70d (n=4) v Euth_I_LN2 (n=6)       | 1523                     | 1250                                                   | 67, 14                                | 0, 0                                              | 0, 0                                               |
| Euth_C_DI_RLT-70d (n=4) v Euth_I_RL (n=6)        | 1003                     | 752                                                    | 62, 18                                | 3, 0                                              | 0, 0                                               |
| Euth_C_DI_RLT-0d (n=6) v Euth_I_LN2 (n=6)        | 3798                     | 3143                                                   | 16, 0                                 | 0, 0                                              | 0, 0                                               |
| Euth_C_DI_RLT-0d (n=6) v Euth_I_RL (n=6)         | 930                      | 718                                                    | 40, 1                                 | 1, 0                                              | 1, 0                                               |

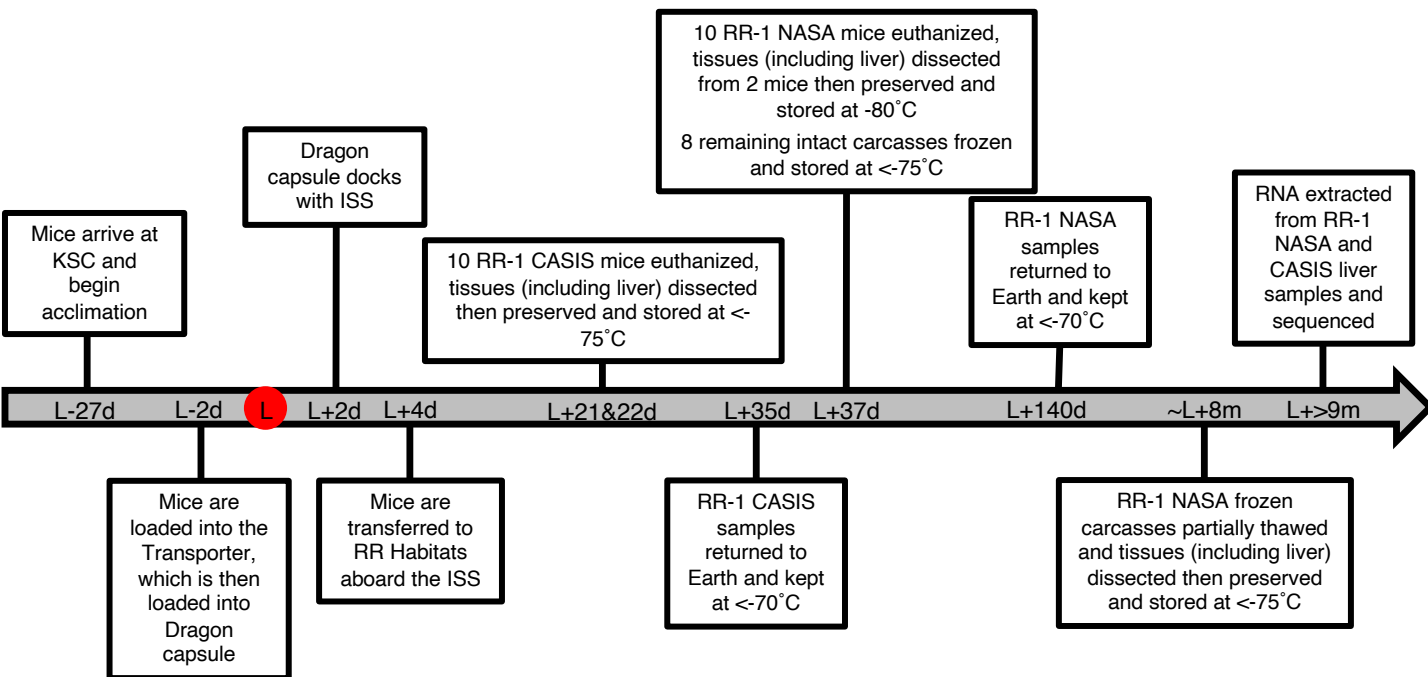

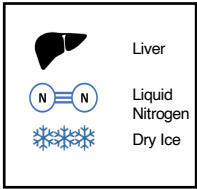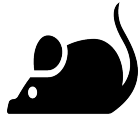

C57BL/6J  
Female  
12 weeks

Euthasol  
IP Injection

ASAP  
(~2  
minutes)

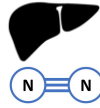

Store at -80°C for 3  
days

Store at -80°C for 1 year

25  
minutes

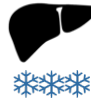

Store at -80°C for 1 year
